# Supplementary material for: Transcriptome-Wide Identification of G-to-A RNA Editing in Chronic Social Defeat Stress Mouse Models
Source: Front Genet. 2021 May 19;12:680548. doi: 10.3389/fgene.2021.680548 (PMC8173075; doi:10.3389/fgene.2021.680548)
Supplement: Supplementary file 1 [file Data_Sheet_1.xlsx]

## Sheet: Table S1
Table S1. G-to-A RNA editing events identified from the mouse brain VTA.
No.	Events	Consequence	SIFT prediction
1	Cdh20:chr1:104993981	missense_variant	deleterious
2	Zcchc2:chr1:106030989	synonymous_variant	-
3	Phlpp1:chr1:106392826	missense_variant	deleterious
4	Phlpp1:chr1:106394073	3_prime_UTR_variant	-
5	Phlpp1:chr1:106394206	3_prime_UTR_variant	-
6	Tsn:chr1:118300341	3_prime_UTR_variant	-
7	Tsn:chr1:118305226	missense_variant	deleterious
8	Clasp1:chr1:118581354	missense_variant	tolerated
9	C1ql2:chr1:120340646	5_prime_UTR_variant	-
10	Ccdc93:chr1:121502655	3_prime_UTR_variant	-
11	Dpp10:chr1:123334191	3_prime_UTR_variant	-
12	Actr3:chr1:125435344	5_prime_UTR_variant	-
13	Mgat5:chr1:127484036	3_prime_UTR_variant	-
14	Ccnt2:chr1:127806537	3_prime_UTR_variant	-
15	R3hdm1:chr1:128216534	missense_variant	deleterious
16	R3hdm1:chr1:128223598	missense_variant	deleterious
17	Ubxn4:chr1:128262904	missense_variant	deleterious
18	Mapkapk2:chr1:131058378	missense_variant	tolerated
19	Srgap2:chr1:131286721	3_prime_UTR_variant	-
20	Slc41a1:chr1:131847552	3_prime_UTR_variant	-
21	Slc41a1:chr1:131848305	3_prime_UTR_variant	-
22	Cdk18:chr1:132114846	3_prime_UTR_variant	-
23	Tmcc2:chr1:132360965	missense_variant	deleterious
24	Tmcc2:chr1:132360985	synonymous_variant	-
25	Rbbp5:chr1:132490548	missense_variant	deleterious
26	Nfasc:chr1:132565566	3_prime_UTR_variant	-
27	Nfasc:chr1:132568183	3_prime_UTR_variant	-
28	Nfasc:chr1:132570553	missense_variant	tolerated
29	Nfasc:chr1:132621023	missense_variant	tolerated
30	Nfasc:chr1:132637034	missense_variant	deleterious
31	Pik3c2b:chr1:133107641	3_prime_UTR_variant	-
32	Ppp1r15b:chr1:133137339	3_prime_UTR_variant	-
33	Plekha6:chr1:133293769	missense_variant	deleterious
34	Plekha6:chr1:133300468	3_prime_UTR_variant	-
35	Plekha6:chr1:133300543	3_prime_UTR_variant	-
36	Atp2b4:chr1:133706406	3_prime_UTR_variant	-
37	Kdm5b:chr1:134597653	synonymous_variant	-
38	Syt2:chr1:134745793	missense_variant	tolerated
39	Syt2:chr1:134745797	missense_variant	deleterious
40	Syt2:chr1:134748306	3_prime_UTR_variant	-
41	Arl8a:chr1:135154194	synonymous_variant	-
42	Arl8a:chr1:135155261	missense_variant	tolerated
43	Arl8a:chr1:135155621	3_prime_UTR_variant	-
44	Gpr37l1:chr1:135167484	synonymous_variant	-
45	Timm17a:chr1:135301560	3_prime_UTR_variant	-
46	Shisa4:chr1:135374385	missense_variant	tolerated
47	Nav1:chr1:135436985	3_prime_UTR_variant	-
48	Nav1:chr1:135441682	3_prime_UTR_variant	-
49	Nav1:chr1:135448983	stop_gained	-
50	Csrp1:chr1:135751267	3_prime_UTR_variant	-
51	Csrp1:chr1:135751437	3_prime_UTR_variant	-
52	Phlda3:chr1:135766458	missense_variant	tolerated
53	Tmem9:chr1:136034751	3_prime_UTR_variant	-
54	Kif21b:chr1:136151208	synonymous_variant	-
55	Zbtb41:chr1:139449088	3_prime_UTR_variant	-
56	Zbtb41:chr1:139449090	3_prime_UTR_variant	-
57	Rgs2:chr1:144001078	3_prime_UTR_variant	-
58	Tpr:chr1:150411963	synonymous_variant	-
59	Tpr:chr1:150440131	missense_variant	tolerated
60	Edem3:chr1:151782490	missense_variant	deleterious
61	Arpc5:chr1:152774950	3_prime_UTR_variant	-
62	Nmnat2:chr1:153115659	missense_variant	tolerated
63	Nmnat2:chr1:153116200	3_prime_UTR_variant	-
64	Nmnat2:chr1:153116468	3_prime_UTR_variant	-
65	Rgs8:chr1:153697563	3_prime_UTR_variant	-
66	Glul:chr1:153907058	missense_variant	deleterious
67	Glul:chr1:153907320	missense_variant	tolerated
68	Glul:chr1:153908233	3_prime_UTR_variant	-
69	Glul:chr1:153908631	3_prime_UTR_variant	-
70	Glul:chr1:153909169	3_prime_UTR_variant	-
71	Cacna1e:chr1:154395574	3_prime_UTR_variant	-
72	Xpr1:chr1:155276612	3_prime_UTR_variant	-
73	Xpr1:chr1:155313183	synonymous_variant	-
74	Fam20b:chr1:156679512	3_prime_UTR_variant	-
75	Rasal2:chr1:157137683	3_prime_UTR_variant	-
76	Kcnb2:chr1:15723463	3_prime_UTR_variant	-
77	Brinp2:chr1:158246261	synonymous_variant	-
78	Astn1:chr1:158690096	3_prime_UTR_variant	-
79	Mrps14:chr1:160197053	synonymous_variant	-
80	Rabgap1l:chr1:160226508	missense_variant	deleterious
81	Suco:chr1:161817862	3_prime_UTR_variant	-
82	Dnm3:chr1:162084055	missense_variant	deleterious
83	Vamp4:chr1:162598993	3_prime_UTR_variant	-
84	Prrc2c:chr1:162697757	missense_variant	tolerated_low_confidence
85	Prrc2c:chr1:162706317	missense_variant	tolerated
86	Prrc2c:chr1:162710422	synonymous_variant	-
87	Kifap3:chr1:163916751	3_prime_UTR_variant	-
88	Rgs5:chr1:169695398	3_prime_UTR_variant	-
89	Sdhc:chr1:171136000	missense_variant	tolerated
90	Sdhc:chr1:171136029	synonymous_variant	-
91	Ndufs2:chr1:171236623	missense_variant	deleterious
92	Adamts4:chr1:171257091	synonymous_variant	-
93	Adamts4:chr1:171260413	3_prime_UTR_variant	-
94	Vangl2:chr1:172007920	missense_variant	deleterious
95	Pex19:chr1:172135019	3_prime_UTR_variant	-
96	Pex19:chr1:172135132	3_prime_UTR_variant	-
97	Dcaf8:chr1:172172583	missense_variant	deleterious
98	Pea15a:chr1:172197501	3_prime_UTR_variant	-
99	Igsf8:chr1:172319746	3_prime_UTR_variant	-
100	Kcnj9:chr1:172323094	synonymous_variant	-
101	Kcnj10:chr1:172372643	3_prime_UTR_variant	-
102	Kcnj10:chr1:172373622	3_prime_UTR_variant	-
103	Fmn2:chr1:174502654	synonymous_variant	-
104	Fmn2:chr1:174502657	synonymous_variant	-
105	Fmn2:chr1:174694482	missense_variant	deleterious
106	Cep170:chr1:176792571	missense_variant	deleterious
107	Adss:chr1:177771226	missense_variant	deleterious
108	Hnrnpu:chr1:178331127	synonymous_variant	-
109	Stum:chr1:180433477	3_prime_UTR_variant	-
110	Stum:chr1:180435806	3_prime_UTR_variant	-
111	Stum:chr1:180437274	3_prime_UTR_variant	-
112	Stum:chr1:180438008	3_prime_UTR_variant	-
113	Nvl:chr1:181123978	missense_variant	deleterious
114	Enah:chr1:181896653	3_prime_UTR_variant	-
115	Enah:chr1:181905584	3_prime_UTR_variant	-
116	Degs1:chr1:182276089	3_prime_UTR_variant	-
117	1700047M11Rik:chr1:182288160	non_coding_transcript_exon_variant	-
118	Trp53bp2:chr1:182446681	synonymous_variant	-
119	Susd4:chr1:182892248	missense_variant	tolerated
120	Mark1:chr1:184919549	missense_variant	deleterious
121	Rab3gap2:chr1:185259411	missense_variant	tolerated
122	Rab3gap2:chr1:185262765	missense_variant	tolerated
123	Esrrg:chr1:188211913	3_prime_UTR_variant	-
124	Esrrg:chr1:188213573	3_prime_UTR_variant	-
125	Kctd3:chr1:188972581	synonymous_variant	-
126	Prox1:chr1:190122059	3_prime_UTR_variant	-
127	Flvcr1:chr1:191007728	3_prime_UTR_variant	-
128	Lpgat1:chr1:191749653	missense_variant	tolerated
129	Lpgat1:chr1:191776359	synonymous_variant	-
130	Lpgat1:chr1:191779277	3_prime_UTR_variant	-
131	Paqr8:chr1:20936361	3_prime_UTR_variant	-
132	Ogfrl1:chr1:23367593	3_prime_UTR_variant	-
133	Sdhaf4:chr1:23996276	missense_variant	deleterious
134	Bend6:chr1:33853183	3_prime_UTR_variant	-
135	Dst:chr1:34198703	synonymous_variant	-
136	Dst:chr1:34201323	missense_variant	tolerated
137	Dst:chr1:34225815	missense_variant	tolerated
138	Dst:chr1:34228451	missense_variant	tolerated
139	Dst:chr1:34260250	synonymous_variant	-
140	Arhgef4:chr1:34807259	synonymous_variant	-
141	Actr1b:chr1:36699511	3_prime_UTR_variant	-
142	Actr1b:chr1:36701183	synonymous_variant	-
143	Tmem131:chr1:36794161	synonymous_variant	-
144	Unc50:chr1:37438846	3_prime_UTR_variant	-
145	Eif5b:chr1:38019103	missense_variant	tolerated_low_confidence
146	Aff3:chr1:38179293	3_prime_UTR_variant	-
147	Map4k4:chr1:40014186	synonymous_variant	-
148	Gls:chr1:52163644	3_prime_UTR_variant	-
149	Gls:chr1:52168528	synonymous_variant	-
150	Mfsd6:chr1:52658106	3_prime_UTR_variant	-
151	Inpp1:chr1:52786699	3_prime_UTR_variant	-
152	Inpp1:chr1:52786711	3_prime_UTR_variant	-
153	Gtf3c3:chr1:54434177	synonymous_variant	-
154	Sf3b1:chr1:54988131	synonymous_variant	-
155	Sf3b1:chr1:55006300	missense_variant	tolerated
156	Hspd1:chr1:55086775	missense_variant	deleterious
157	Mob4:chr1:55154576	3_prime_UTR_variant	-
158	Oprk1:chr1:5604350	3_prime_UTR_variant	-
159	Bmpr2:chr1:59863834	synonymous_variant	-
160	Bmpr2:chr1:59872002	3_prime_UTR_variant	-
161	Bmpr2:chr1:59872249	3_prime_UTR_variant	-
162	Bmpr2:chr1:59874284	3_prime_UTR_variant	-
163	Wdr12:chr1:60075333	3_prime_UTR_variant	-
164	Eif4a-ps4:chr1:60704699	non_coding_transcript_exon_variant	-
165	Eif4a-ps4:chr1:60705007	non_coding_transcript_exon_variant	-
166	Zdbf2:chr1:63314141	3_prime_UTR_variant	-
167	Adam23:chr1:63593688	3_prime_UTR_variant	-
168	Klf7:chr1:64042400	synonymous_variant	-
169	Unc80:chr1:66627258	synonymous_variant	-
170	Unc80:chr1:66698532	3_prime_UTR_variant	-
171	Acadl:chr1:66838304	missense_variant	tolerated
172	Lancl1:chr1:67002320	3_prime_UTR_variant	-
173	Atic:chr1:71564504	missense_variant	tolerated
174	Smarcal1:chr1:72632902	missense_variant	tolerated
175	Igfbp5:chr1:72858298	3_prime_UTR_variant	-
176	Pnkd:chr1:74351817	synonymous_variant	-
177	Ctdsp1:chr1:74396907	3_prime_UTR_variant	-
178	Plcd4:chr1:74557815	synonymous_variant	-
179	Resp18:chr1:75275673	missense_variant	deleterious
180	Speg:chr1:75419087	missense_variant	deleterious
181	Gmppa:chr1:75441595	synonymous_variant	-
182	Slc4a3:chr1:75548091	missense_variant	tolerated_low_confidence
183	Scg2:chr1:79435327	missense_variant	deleterious
184	Serpine2:chr1:79794366	3_prime_UTR_variant	-
185	Dock10:chr1:80510368	missense_variant	tolerated
186	Sphkap:chr1:83277305	missense_variant	tolerated
187	Sphkap:chr1:83278253	missense_variant	tolerated
188	Trip12:chr1:84722217	3_prime_UTR_variant	-
189	Cab39:chr1:85844634	synonymous_variant	-
190	Itm2c:chr1:85908545	3_prime_UTR_variant	-
191	Ncl:chr1:86349408	3_prime_UTR_variant	-
192	Ptma:chr1:86529182	missense_variant	tolerated
193	Ecel1:chr1:87155000	5_prime_UTR_variant	-
194	Eif4e2:chr1:87238676	3_prime_UTR_variant	-
195	Ngef:chr1:87482691	missense_variant	tolerated
196	Agap1:chr1:89634203	synonymous_variant	-
197	Agap1:chr1:89843211	synonymous_variant	-
198	Agap1:chr1:89892594	3_prime_UTR_variant	-
199	Agap1:chr1:89893261	3_prime_UTR_variant	-
200	Cops8:chr1:90612657	3_prime_UTR_variant	-
201	Hdlbp:chr1:93405977	3_prime_UTR_variant	-
202	Septin2:chr1:93499366	synonymous_variant	-
203	Thap4:chr1:93750577	synonymous_variant	-
204	Vcpip1:chr1:9747729	missense_variant	deleterious
205	Vcpip1:chr1:9747731	synonymous_variant	-
206	D1Ertd622e:chr1:97644577	3_prime_UTR_variant	-
207	Pam:chr1:97840375	missense_variant	deleterious
208	Slc6a15:chr10:103394015	missense_variant	tolerated
209	Grm1:chr10:10688477	3_prime_UTR_variant	-
210	Grm1:chr10:10719253	missense_variant	deleterious
211	Ppp1r12a:chr10:108162616	missense_variant	deleterious
212	Syt1:chr10:108498094	3_prime_UTR_variant	-
213	Syt1:chr10:109010825	5_prime_UTR_variant	-
214	Zdhhc17:chr10:110944381	3_prime_UTR_variant	-
215	Zdhhc17:chr10:110950595	missense_variant	deleterious
216	Nap1l1:chr10:111494819	missense_variant	tolerated
217	Kcnc2:chr10:112271995	missense_variant	tolerated_low_confidence
218	Kcnc2:chr10:112456301	missense_variant	deleterious
219	Tmem19:chr10:115342610	missense_variant	tolerated
220	Zfc3h1:chr10:115416884	stop_gained	-
221	Frs2:chr10:117071503	3_prime_UTR_variant	-
222	Cpsf6:chr10:117360901	missense_variant	deleterious
223	Mdm2:chr10:117689557	3_prime_UTR_variant	-
224	Cand1:chr10:119201096	3_prime_UTR_variant	-
225	Cand1:chr10:119203134	synonymous_variant	-
226	Tbc1d30:chr10:121275797	missense_variant	tolerated
227	Gns:chr10:121376251	missense_variant	deleterious
228	Tbk1:chr10:121553924	missense_variant	tolerated
229	Tbk1:chr10:121571915	synonymous_variant	-
230	Xpot:chr10:121607080	synonymous_variant	-
231	Srgap1:chr10:121784924	3_prime_UTR_variant	-
232	Usp15:chr10:123125850	missense_variant	tolerated
233	Ctdsp2:chr10:126992622	synonymous_variant	-
234	Ctdsp2:chr10:126996427	missense_variant	deleterious
235	Agap2:chr10:127082416	synonymous_variant	-
236	Agap2:chr10:127091738	missense_variant	deleterious_low_confidence
237	B4galnt1:chr10:127171095	synonymous_variant	-
238	Dtx3:chr10:127190534	3_prime_UTR_variant	-
239	Dtx3:chr10:127190643	3_prime_UTR_variant	-
240	Kif5a:chr10:127225734	3_prime_UTR_variant	-
241	Kif5a:chr10:127231017	missense_variant	deleterious
242	Kif5a:chr10:127233901	synonymous_variant	-
243	Ddit3:chr10:127296215	3_prime_UTR_variant	-
244	Mars1:chr10:127310009	missense_variant	tolerated
245	Gli1:chr10:127330536	synonymous_variant	-
246	R3hdm2:chr10:127485563	missense_variant	tolerated
247	Lrp1:chr10:127550615	missense_variant	tolerated
248	Lrp1:chr10:127556633	synonymous_variant	-
249	Lrp1:chr10:127560080	synonymous_variant	-
250	Lrp1:chr10:127572455	missense_variant	tolerated
251	Lrp1:chr10:127584661	missense_variant	deleterious
252	Lrp1:chr10:127588526	missense_variant	deleterious
253	Lrp1:chr10:127588538	missense_variant	deleterious
254	Lrp1:chr10:127590649	synonymous_variant	-
255	Stat6:chr10:127660240	3_prime_UTR_variant	-
256	Stat6:chr10:127660269	3_prime_UTR_variant	-
257	Atp5b:chr10:128089038	missense_variant	deleterious_low_confidence
258	Gls2:chr10:128199674	missense_variant	deleterious
259	Gls2:chr10:128209844	3_prime_UTR_variant	-
260	Cnpy2:chr10:128326668	missense_variant	tolerated
261	Rab5b:chr10:128677619	3_prime_UTR_variant	-
262	Sf3b5:chr10:13008681	missense_variant	deleterious
263	Sf3b5:chr10:13008910	3_prime_UTR_variant	-
264	Sf3b5:chr10:13009026	3_prime_UTR_variant	-
265	Plagl1:chr10:13127418	synonymous_variant	-
266	Reps1:chr10:18093287	missense_variant	deleterious
267	Arfgef3:chr10:18585293	3_prime_UTR_variant	-
268	Arfgef3:chr10:18625232	missense_variant	tolerated
269	Map7:chr10:20230849	missense_variant	deleterious
270	Ahi1:chr10:21079992	3_prime_UTR_variant	-
271	Ptprk:chr10:28566611	missense_variant	deleterious
272	Hint3:chr10:30610341	synonymous_variant	-
273	Ncoa7:chr10:30691421	synonymous_variant	-
274	Nkain2:chr10:31691381	3_prime_UTR_variant	-
275	Tspyl1:chr10:34283805	3_prime_UTR_variant	-
276	Hdac2:chr10:36998556	synonymous_variant	-
277	Hdac2:chr10:37000376	synonymous_variant	-
278	Fyn:chr10:39532023	stop_gained	-
279	Wasf1:chr10:40920354	missense_variant	deleterious
280	Cd164:chr10:41528717	missense_variant	deleterious
281	Cd164:chr10:41528737	missense_variant	deleterious
282	Ostm1:chr10:42700544	3_prime_UTR_variant	-
283	Ostm1:chr10:42701609	3_prime_UTR_variant	-
284	Akap12:chr10:4354329	missense_variant	deleterious
285	Grik2:chr10:49101219	synonymous_variant	-
286	Syne1:chr10:5228030	missense_variant	-
287	Fam184a:chr10:53698661	missense_variant	tolerated
288	Hsf2:chr10:57486543	missense_variant	deleterious
289	Dnajb12:chr10:59892759	missense_variant	tolerated
290	Spock2:chr10:60132344	3_prime_UTR_variant	-
291	Spock2:chr10:60133745	3_prime_UTR_variant	-
292	Spock2:chr10:60134458	3_prime_UTR_variant	-
293	Ppa1:chr10:61665447	synonymous_variant	-
294	Sar1a:chr10:61691366	missense_variant	deleterious
295	Macroh2a2:chr10:61739284	3_prime_UTR_variant	-
296	Macroh2a2:chr10:61749330	synonymous_variant	-
297	Hk1:chr10:62274486	missense_variant	deleterious
298	Kifbp:chr10:62575079	missense_variant	tolerated
299	Kifbp:chr10:62575080	synonymous_variant	-
300	Ddx50:chr10:62627609	missense_variant	tolerated
301	Rufy2:chr10:63004762	synonymous_variant	-
302	Ado:chr10:67548387	synonymous_variant	-
303	Zfp365:chr10:67886247	3_prime_UTR_variant	-
304	Zfp365:chr10:67888811	3_prime_UTR_variant	-
305	Arid5b:chr10:68098171	missense_variant	deleterious_low_confidence
306	Ank3:chr10:70024191	3_prime_UTR_variant	-
307	Ank3:chr10:70025321	3_prime_UTR_variant	-
308	Ccdc6:chr10:70097529	missense_variant	tolerated
309	Zwint:chr10:72656564	synonymous_variant	-
310	Bcr:chr10:75061581	missense_variant	deleterious_low_confidence
311	Bcr:chr10:75145431	missense_variant	deleterious
312	Bcr:chr10:75157090	missense_variant	tolerated
313	Bcr:chr10:75183046	3_prime_UTR_variant	-
314	Specc1l:chr10:75261868	missense_variant	deleterious
315	Susd2:chr10:75639906	missense_variant	deleterious
316	Smarcb1:chr10:75910213	missense_variant	deleterious
317	Chchd10:chr10:75936338	missense_variant	deleterious
318	Chchd10:chr10:75937706	3_prime_UTR_variant	-
319	Prmt2:chr10:76225404	missense_variant	deleterious
320	Lrp11:chr10:7623805	3_prime_UTR_variant	-
321	Pcnt:chr10:76380249	synonymous_variant	-
322	Col6a1:chr10:76709589	synonymous_variant	-
323	Lats1:chr10:7691393	5_prime_UTR_variant	-
324	Pofut2:chr10:77268778	3_prime_UTR_variant	-
325	Adarb1:chr10:77291126	3_prime_UTR_variant	-
326	Adarb1:chr10:77291567	3_prime_UTR_variant	-
327	Adarb1:chr10:77294593	3_prime_UTR_variant	-
328	Adarb1:chr10:77303347	missense_variant	deleterious
329	Adarb1:chr10:77321985	synonymous_variant	-
330	Adarb1:chr10:77359614	5_prime_UTR_variant	-
331	Ube2g2:chr10:77645747	3_prime_UTR_variant	-
332	Trpm2:chr10:77918936	missense_variant	deleterious
333	Trpm2:chr10:77924080	missense_variant	deleterious
334	Agpat3:chr10:78271649	3_prime_UTR_variant	-
335	Agpat3:chr10:78271755	3_prime_UTR_variant	-
336	Agpat3:chr10:78273611	3_prime_UTR_variant	-
337	Agpat3:chr10:78273613	3_prime_UTR_variant	-
338	Rrp1:chr10:78400914	synonymous_variant	-
339	Rrp1:chr10:78400927	missense_variant	tolerated
340	Cstb:chr10:78425849	missense_variant	tolerated
341	Pdxk:chr10:78438105	3_prime_UTR_variant	-
342	Pdxk:chr10:78443906	missense_variant	deleterious
343	Tpgs1:chr10:79675453	missense_variant	deleterious
344	Hcn2:chr10:79733892	synonymous_variant	-
345	Hcn2:chr10:79735442	missense_variant	deleterious_low_confidence
346	Wdr18:chr10:79967349	synonymous_variant	-
347	Wdr18:chr10:79967574	missense_variant	tolerated
348	Wdr18:chr10:79967918	3_prime_UTR_variant	-
349	Tmem259:chr10:79983916	synonymous_variant	-
350	Tmem259:chr10:79983938	missense_variant	deleterious
351	Stk11:chr10:80116166	5_prime_UTR_variant	-
352	Stk11:chr10:80126148	missense_variant	deleterious
353	Pwwp3a:chr10:80232383	synonymous_variant	-
354	Apc2:chr10:80311896	missense_variant	tolerated
355	Mbd3:chr10:80393978	missense_variant	tolerated
356	Abhd17a:chr10:80586656	missense_variant	tolerated
357	Btbd2:chr10:80647788	missense_variant	deleterious
358	Mknk2:chr10:80666804	3_prime_UTR_variant	-
359	Mknk2:chr10:80667975	stop_gained	-
360	Ap3d1:chr10:80710777	missense_variant	tolerated_low_confidence
361	Ap3d1:chr10:80712773	missense_variant	tolerated_low_confidence
362	Oaz1:chr10:80826886	missense_variant	tolerated
363	Sgta:chr10:81044348	3_prime_UTR_variant	-
364	Map2k2:chr10:81108802	synonymous_variant	-
365	Pias4:chr10:81153742	3_prime_UTR_variant	-
366	Pias4:chr10:81154546	missense_variant	tolerated
367	Eef2:chr10:81177770	missense_variant	deleterious
368	Eef2:chr10:81180383	missense_variant	deleterious
369	Eef2:chr10:81180406	missense_variant	deleterious
370	Eef2:chr10:81181262	missense_variant	tolerated
371	Eef2:chr10:81182453	3_prime_UTR_variant	-
372	Dapk3:chr10:81190174	missense_variant	deleterious
373	Dapk3:chr10:81190197	synonymous_variant	-
374	Dapk3:chr10:81190453	synonymous_variant	-
375	Atcay:chr10:81213330	missense_variant	tolerated
376	Zfr2:chr10:81247383	missense_variant	tolerated
377	Hmg20b:chr10:81348017	missense_variant	tolerated
378	Celf5:chr10:81459531	3_prime_UTR_variant	-
379	Ncln:chr10:81488437	synonymous_variant	-
380	Gna11:chr10:81529306	3_prime_UTR_variant	-
381	Tle5:chr10:81565676	missense_variant	deleterious
382	Nfyb:chr10:82751397	synonymous_variant	-
383	Txnrd1:chr10:82890496	missense_variant	deleterious
384	Appl2:chr10:83611155	synonymous_variant	-
385	Nuak1:chr10:84371733	3_prime_UTR_variant	-
386	Tcp11l2:chr10:84584932	missense_variant	deleterious
387	Ric8b:chr10:85015724	3_prime_UTR_variant	-
388	Btbd11:chr10:85561631	missense_variant	tolerated
389	Nt5dc3:chr10:86835353	3_prime_UTR_variant	-
390	Nt5dc3:chr10:86836888	3_prime_UTR_variant	-
391	Sash1:chr10:8722834	3_prime_UTR_variant	-
392	Sash1:chr10:8729716	missense_variant	tolerated_low_confidence
393	Sash1:chr10:8740230	missense_variant	tolerated
394	Gnptab:chr10:88436174	missense_variant	tolerated
395	Utp20:chr10:88758345	missense_variant	deleterious
396	Anks1b:chr10:90969997	3_prime_UTR_variant	-
397	Tmpo:chr10:91149719	synonymous_variant	-
398	Plxnc1:chr10:94792607	3_prime_UTR_variant	-
399	Ube2n:chr10:95544525	3_prime_UTR_variant	-
400	Nudt4:chr10:95549365	missense_variant	tolerated
401	Acly:chr11:100481399	missense_variant	deleterious
402	Cnp:chr11:100576570	missense_variant	tolerated
403	Cavin1:chr11:100959129	missense_variant	deleterious
404	Cavin1:chr11:100970323	synonymous_variant	-
405	Tubg2:chr11:101156872	synonymous_variant	-
406	Cntnap1:chr11:101189830	3_prime_UTR_variant	-
407	Psme3:chr11:101322453	3_prime_UTR_variant	-
408	Aarsd1:chr11:101411945	synonymous_variant	-
409	Aarsd1:chr11:101411957	synonymous_variant	-
410	Rundc1:chr11:101433755	missense_variant	deleterious
411	Rundc1:chr11:101433952	missense_variant	deleterious
412	Dusp3:chr11:101972369	3_prime_UTR_variant	-
413	Dusp3:chr11:101972511	3_prime_UTR_variant	-
414	Dusp3:chr11:101973041	3_prime_UTR_variant	-
415	Mpp3:chr11:102000419	3_prime_UTR_variant	-
416	Ubtf:chr11:102308995	missense_variant	tolerated
417	Ubtf:chr11:102310248	synonymous_variant	-
418	Gpatch8:chr11:102478220	synonymous_variant	-
419	Fzd2:chr11:102604886	missense_variant	deleterious
420	Gosr2:chr11:103677211	3_prime_UTR_variant	-
421	Nsf:chr11:103821874	3_prime_UTR_variant	-
422	Nsf:chr11:103822288	3_prime_UTR_variant	-
423	Nsf:chr11:103861959	missense_variant	deleterious
424	Arf2:chr11:103984742	3_prime_UTR_variant	-
425	Crhr1:chr11:104169897	missense_variant	tolerated
426	Mapt:chr11:104321407	synonymous_variant	-
427	Tanc2:chr11:105673457	synonymous_variant	-
428	Tanc2:chr11:105776877	missense_variant	deleterious
429	Tanc2:chr11:105857510	synonymous_variant	-
430	Tanc2:chr11:105925236	3_prime_UTR_variant	-
431	Tanc2:chr11:105928123	3_prime_UTR_variant	-
432	Dcaf7:chr11:106037144	synonymous_variant	-
433	Dcaf7:chr11:106055717	3_prime_UTR_variant	-
434	Dcaf7:chr11:106056098	3_prime_UTR_variant	-
435	Ddx42:chr11:106242962	missense_variant	deleterious
436	Tex2:chr11:106568606	5_prime_UTR_variant	-
437	Bptf:chr11:107058741	missense_variant	deleterious
438	Helz:chr11:107685514	missense_variant	tolerated_low_confidence
439	Cacng4:chr11:107732597	3_prime_UTR_variant	-
440	Prkca:chr11:107934101	3_prime_UTR_variant	-
441	Gna13:chr11:109396959	3_prime_UTR_variant	-
442	Gna13:chr11:109401003	3_prime_UTR_variant	-
443	Amz2:chr11:109428997	missense_variant	tolerated
444	Wipi1:chr11:109573844	3_prime_UTR_variant	-
445	Wipi1:chr11:109605915	missense_variant	deleterious
446	Vwc2:chr11:11116002	missense_variant	deleterious_low_confidence
447	Ttyh2:chr11:114686485	missense_variant	deleterious
448	Ttyh2:chr11:114690275	synonymous_variant	-
449	Ttyh2:chr11:114720186	3_prime_UTR_variant	-
450	Ttyh2:chr11:114720675	3_prime_UTR_variant	-
451	Btbd17:chr11:114791519	missense_variant	tolerated
452	Hid1:chr11:115351044	missense_variant	tolerated
453	Kctd2:chr11:115420238	missense_variant	deleterious_low_confidence
454	Jpt1:chr11:115498044	3_prime_UTR_variant	-
455	Jpt1:chr11:115503073	missense_variant	tolerated
456	Mrps7:chr11:115605066	missense_variant	deleterious
457	Mrps7:chr11:115606046	missense_variant	tolerated
458	H3f3b:chr11:116023716	missense_variant	deleterious_low_confidence
459	Srp68:chr11:116274046	missense_variant	tolerated_low_confidence
460	Ube2o:chr11:116546466	missense_variant	deleterious
461	Cygb:chr11:116653842	synonymous_variant	-
462	Mgat5b:chr11:116948610	stop_gained	-
463	Mgat5b:chr11:116966817	missense_variant	deleterious
464	Mgat5b:chr11:116973341	synonymous_variant	-
465	Tnrc6c:chr11:117759705	missense_variant	deleterious
466	Tnrc6c:chr11:117759728	synonymous_variant	-
467	Usp36:chr11:118264744	missense_variant	deleterious_low_confidence
468	Lgals3bp:chr11:118392993	3_prime_UTR_variant	-
469	Rbfox3:chr11:118505704	synonymous_variant	-
470	Cbx4:chr11:119081133	missense_variant	deleterious
471	Gaa:chr11:119283777	missense_variant	deleterious
472	Nptx1:chr11:119540850	3_prime_UTR_variant	-
473	Rptor:chr11:119898398	3_prime_UTR_variant	-
474	Cep131:chr11:120065761	synonymous_variant	-
475	Rac3:chr11:120722525	missense_variant	tolerated_low_confidence
476	Dus1l:chr11:120792440	missense_variant	deleterious
477	Fasn:chr11:120816340	missense_variant	deleterious
478	Csnk1d:chr11:120969157	missense_variant	tolerated_low_confidence
479	Csnk1d:chr11:120972538	missense_variant	deleterious_low_confidence
480	Narf:chr11:121253485	3_prime_UTR_variant	-
481	Vstm2a:chr11:16259932	missense_variant	deleterious
482	Akt2-ps:chr11:16515210	non_coding_transcript_exon_variant	-
483	Akt2-ps:chr11:16515684	non_coding_transcript_exon_variant	-
484	Ppp3r1:chr11:17159403	5_prime_UTR_variant	-
485	Glns-ps1:chr11:19720671	non_coding_transcript_exon_variant	-
486	Rab1a:chr11:20201604	5_prime_UTR_variant	-
487	Slc1a4:chr11:20307980	missense_variant	deleterious
488	Vps54:chr11:21319997	3_prime_UTR_variant	-
489	Ehbp1:chr11:22006728	3_prime_UTR_variant	-
490	Ehbp1:chr11:22056571	missense_variant	tolerated
491	Ehbp1:chr11:22095737	missense_variant	tolerated_low_confidence
492	Xpo1:chr11:23278901	synonymous_variant	-
493	Ahsa2:chr11:23489315	3_prime_UTR_variant	-
494	Ccdc85a:chr11:28577081	missense_variant	tolerated
495	Cfap36:chr11:29234378	missense_variant	tolerated
496	Sptbn1:chr11:30099417	3_prime_UTR_variant	-
497	Sptbn1:chr11:30109927	synonymous_variant	-
498	Sptbn1:chr11:30109931	missense_variant	tolerated
499	Sptbn1:chr11:30119407	missense_variant	tolerated
500	Sptbn1:chr11:30121540	missense_variant	tolerated
501	Sptbn1:chr11:30143100	synonymous_variant	-
502	Sptbn1:chr11:30146749	missense_variant	deleterious
503	Nsg2:chr11:32057460	synonymous_variant	-
504	Nsg2:chr11:32058777	3_prime_UTR_variant	-
505	Kcnip1:chr11:33630433	3_prime_UTR_variant	-
506	Pank3:chr11:35787865	3_prime_UTR_variant	-
507	Tenm2:chr11:36106787	missense_variant	deleterious
508	Mat2b:chr11:40684747	missense_variant	tolerated
509	Ttc1:chr11:43741803	missense_variant	tolerated
510	Clint1:chr11:45909142	missense_variant	deleterious
511	Clint1:chr11:45910056	3_prime_UTR_variant	-
512	Cyfip2:chr11:46196314	missense_variant	tolerated
513	Trim41:chr11:48806849	3_prime_UTR_variant	-
514	Trim41:chr11:48815905	missense_variant	tolerated
515	Gm12184:chr11:48826224	synonymous_variant	-
516	Thoc5:chr11:4902400	synonymous_variant	-
517	Mgat1:chr11:49261277	missense_variant	-
518	Mapk9:chr11:49846875	5_prime_UTR_variant	-
519	Mapk9:chr11:49883306	3_prime_UTR_variant	-
520	Mapk9:chr11:49886002	3_prime_UTR_variant	-
521	Rnf130:chr11:50025564	missense_variant	tolerated
522	Rnf130:chr11:50121872	3_prime_UTR_variant	-
523	Canx:chr11:50296090	3_prime_UTR_variant	-
524	Canx:chr11:50297284	synonymous_variant	-
525	Canx:chr11:50307486	synonymous_variant	-
526	Rufy1:chr11:50430807	missense_variant	tolerated_low_confidence
527	Clk4:chr11:51275479	missense_variant	deleterious
528	Clk4:chr11:51281180	missense_variant	tolerated
529	Jade2:chr11:51815514	3_prime_UTR_variant	-
530	Vdac1:chr11:52389105	3_prime_UTR_variant	-
531	9530068E07Rik:chr11:52407807	3_prime_UTR_variant	-
532	Hspa4:chr11:53260936	3_prime_UTR_variant	-
533	Uqcrq:chr11:53429000	3_prime_UTR_variant	-
534	Septin8:chr11:53535108	synonymous_variant	-
535	Septin8:chr11:53537610	synonymous_variant	-
536	Kif3a:chr11:53583341	missense_variant	deleterious
537	Irf1:chr11:53770171	5_prime_UTR_variant	-
538	Slc22a5:chr11:53891537	start_lost	tolerated
539	Fnip1:chr11:54503056	missense_variant	deleterious
540	Rapgef6:chr11:54691345	missense_variant	deleterious_low_confidence
541	Gpx3:chr11:54909054	missense_variant	deleterious
542	Anxa6:chr11:55004696	missense_variant	deleterious
543	Gm2a:chr11:55098131	5_prime_UTR_variant	-
544	Gm2a:chr11:55108965	missense_variant	deleterious
545	Gm2a:chr11:55109778	3_prime_UTR_variant	-
546	Gm2a:chr11:55110595	3_prime_UTR_variant	-
547	Sparc:chr11:55394785	3_prime_UTR_variant	-
548	G3bp1:chr11:55503698	3_prime_UTR_variant	-
549	Gria1:chr11:57328848	3_prime_UTR_variant	-
550	Gria1:chr11:57329863	3_prime_UTR_variant	-
551	Rnf187:chr11:58937182	synonymous_variant	-
552	Gjc2:chr11:59175698	3_prime_UTR_variant	-
553	Arf1:chr11:59211809	3_prime_UTR_variant	-
554	Arf1:chr11:59213197	missense_variant	deleterious_low_confidence
555	Mprip:chr11:59752864	missense_variant	tolerated
556	Flcn:chr11:59802163	missense_variant	tolerated
557	Srebf1:chr11:60199707	3_prime_UTR_variant	-
558	Srebf1:chr11:60205200	missense_variant	deleterious
559	Tom1l2:chr11:60226787	3_prime_UTR_variant	-
560	Alkbh5:chr11:60557311	3_prime_UTR_variant	-
561	Llgl1:chr11:60709706	missense_variant	deleterious
562	Flii:chr11:60715574	missense_variant	tolerated
563	Smcr8:chr11:60787853	3_prime_UTR_variant	-
564	Nudcd3:chr11:6106689	3_prime_UTR_variant	-
565	Nudcd3:chr11:6106963	3_prime_UTR_variant	-
566	Epn2:chr11:61546468	missense_variant	deleterious
567	Ulk2:chr11:61777447	3_prime_UTR_variant	-
568	Ncor1:chr11:62329537	missense_variant	tolerated
569	Ncor1:chr11:62338980	synonymous_variant	-
570	Ddx56:chr11:6264152	missense_variant	tolerated
571	Tmed4:chr11:6274407	synonymous_variant	-
572	Ogdh:chr11:6340557	missense_variant	tolerated
573	Ogdh:chr11:6349168	stop_gained	-
574	Ogdh:chr11:6350649	missense_variant	deleterious
575	Nacad:chr11:6600506	missense_variant	tolerated
576	Myh10:chr11:68797418	missense_variant	tolerated
577	Myh10:chr11:68802938	synonymous_variant	-
578	Myh10:chr11:68807206	missense_variant	deleterious
579	Myh10:chr11:68811624	missense_variant	deleterious
580	Myh10:chr11:68815222	3_prime_UTR_variant	-
581	Myh10:chr11:68816353	3_prime_UTR_variant	-
582	Ndel1:chr11:68822289	3_prime_UTR_variant	-
583	Ndel1:chr11:68822316	3_prime_UTR_variant	-
584	Ndel1:chr11:68822601	missense_variant	tolerated_low_confidence
585	Arhgef15:chr11:68944327	3_prime_UTR_variant	-
586	Chd3:chr11:69361687	missense_variant	tolerated_low_confidence
587	Efnb3:chr11:69554192	3_prime_UTR_variant	-
588	Efnb3:chr11:69556718	synonymous_variant	-
589	Atp1b2:chr11:69600139	3_prime_UTR_variant	-
590	Atp1b2:chr11:69600452	3_prime_UTR_variant	-
591	Atp1b2:chr11:69600545	3_prime_UTR_variant	-
592	Atp1b2:chr11:69603443	missense_variant	deleterious
593	Atp1b2:chr11:69605466	5_prime_UTR_variant	-
594	Fxr2:chr11:69648919	missense_variant	deleterious
595	Polr2a:chr11:69734513	missense_variant	tolerated
596	Polr2a:chr11:69734769	missense_variant	tolerated
597	Nlgn2:chr11:69823736	3_prime_UTR_variant	-
598	Nlgn2:chr11:69827035	missense_variant	deleterious
599	Phf23:chr11:69999319	missense_variant	deleterious
600	Dlg4:chr11:70044354	synonymous_variant	-
601	Dlg4:chr11:70044825	3_prime_UTR_variant	-
602	Dlg4:chr11:70044910	3_prime_UTR_variant	-
603	Rnasek:chr11:70238409	missense_variant	deleterious
604	Gm12312:chr11:70358215	non_coding_transcript_exon_variant	-
605	Mink1:chr11:70599086	missense_variant	deleterious
606	Mink1:chr11:70606142	missense_variant	tolerated
607	Mink1:chr11:70607358	missense_variant	deleterious
608	Mink1:chr11:70608389	missense_variant	tolerated
609	Rnf167:chr11:70648098	missense_variant	tolerated
610	Camta2:chr11:70681097	missense_variant	tolerated_low_confidence
611	Kif1c:chr11:70703844	missense_variant	deleterious
612	Kif1c:chr11:70726199	synonymous_variant	-
613	Kif1c:chr11:70729028	3_prime_UTR_variant	-
614	Kif1c:chr11:70729047	3_prime_UTR_variant	-
615	Rabep1:chr11:70887098	missense_variant	tolerated
616	Rpain:chr11:70971888	stop_gained	-
617	Adcy1:chr11:7137329	missense_variant	deleterious
618	Pitpnm3:chr11:72056177	missense_variant	deleterious
619	Spns2:chr11:72452084	3_prime_UTR_variant	-
620	Spns2:chr11:72459024	synonymous_variant	-
621	Pafah1b1:chr11:74675358	3_prime_UTR_variant	-
622	Pafah1b1:chr11:74683507	stop_gained	-
623	Sgsm2:chr11:74857639	synonymous_variant	-
624	Sgsm2:chr11:74857640	missense_variant	tolerated
625	Sgsm2:chr11:74868011	synonymous_variant	-
626	Smg6:chr11:75142778	missense_variant	tolerated
627	Slc43a2:chr11:75572884	3_prime_UTR_variant	-
628	Pitpna:chr11:75598210	missense_variant	tolerated
629	Inpp5k:chr11:75648126	3_prime_UTR_variant	-
630	Cpd:chr11:76791901	synonymous_variant	-
631	Cpd:chr11:76792779	synonymous_variant	-
632	Coro6:chr11:77462661	5_prime_UTR_variant	-
633	Coro6:chr11:77462664	5_prime_UTR_variant	-
634	Git1:chr11:77507355	3_prime_UTR_variant	-
635	Myo18a:chr11:77864771	missense_variant	tolerated_low_confidence
636	Flot2:chr11:78059565	3_prime_UTR_variant	-
637	Flot2:chr11:78059569	3_prime_UTR_variant	-
638	Supt6:chr11:78209500	synonymous_variant	-
639	Supt6:chr11:78213318	missense_variant	tolerated
640	Supt6:chr11:78226975	missense_variant	deleterious
641	2610507B11Rik:chr11:78264576	missense_variant	deleterious
642	2610507B11Rik:chr11:78279748	missense_variant	tolerated
643	Aldoc:chr11:78325807	missense_variant	deleterious
644	Pigs:chr11:78329069	missense_variant	tolerated
645	Pigs:chr11:78335456	synonymous_variant	-
646	Unc119:chr11:78348789	3_prime_UTR_variant	-
647	Poldip2:chr11:78522103	3_prime_UTR_variant	-
648	Lyrm9:chr11:78842689	3_prime_UTR_variant	-
649	Ksr1:chr11:79033312	synonymous_variant	-
650	Nf1:chr11:79445103	missense_variant	tolerated
651	Nf1:chr11:79548742	missense_variant	tolerated
652	Nf1:chr11:79580659	3_prime_UTR_variant	-
653	Rab11fip4:chr11:79683409	missense_variant	tolerated
654	Rab11fip4:chr11:79685066	missense_variant	tolerated
655	Rab11fip4:chr11:79685089	missense_variant	tolerated
656	Rab11fip4:chr11:79694166	3_prime_UTR_variant	-
657	Rab11fip4:chr11:79695205	3_prime_UTR_variant	-
658	Rab11fip4:chr11:79697670	3_prime_UTR_variant	-
659	5730455P16Rik:chr11:80362728	3_prime_UTR_variant	-
660	Ap2b1:chr11:83403590	3_prime_UTR_variant	-
661	Rasl10b:chr11:83420243	3_prime_UTR_variant	-
662	Tada2a:chr11:84090646	synonymous_variant	-
663	Acaca:chr11:84257219	missense_variant	tolerated
664	Znhit3:chr11:84911192	3_prime_UTR_variant	-
665	Cltc:chr11:86730282	missense_variant	tolerated
666	Ppm1e:chr11:87228420	3_prime_UTR_variant	-
667	Mtmr4:chr11:87611612	missense_variant	tolerated_low_confidence
668	Supt4a:chr11:87737624	missense_variant	tolerated
669	Tspoap1:chr11:87772114	synonymous_variant	-
670	Dynll2:chr11:87979572	3_prime_UTR_variant	-
671	Dynll2:chr11:87980246	3_prime_UTR_variant	-
672	Cuedc1:chr11:88192678	3_prime_UTR_variant	-
673	Cuedc1:chr11:88193204	3_prime_UTR_variant	-
674	Msi2:chr11:88386077	missense_variant	deleterious
675	Msi2:chr11:88386078	missense_variant	deleterious
676	Hlf:chr11:90340878	missense_variant	deleterious
677	Hlf:chr11:90345863	synonymous_variant	-
678	Spag9:chr11:94124704	3_prime_UTR_variant	-
679	Ankrd40:chr11:94328091	5_prime_UTR_variant	-
680	Ppp1r9b:chr11:94991562	synonymous_variant	-
681	Ppp1r9b:chr11:94996660	synonymous_variant	-
682	Samd14:chr11:95021568	missense_variant	tolerated
683	Samd14:chr11:95024631	synonymous_variant	-
684	Kat7:chr11:95275808	stop_gained	-
685	Spop:chr11:95492821	3_prime_UTR_variant	-
686	Phb:chr11:95680430	3_prime_UTR_variant	-
687	Nfe2l1:chr11:96819639	missense_variant	tolerated
688	Cdk5rap3:chr11:96908765	missense_variant	tolerated
689	Mrpl45:chr11:97328202	stop_gained	-
690	Socs7:chr11:97397777	3_prime_UTR_variant	-
691	Arhgap23:chr11:97451841	synonymous_variant	-
692	Srcin1:chr11:97510186	3_prime_UTR_variant	-
693	Srcin1:chr11:97510324	3_prime_UTR_variant	-
694	Srcin1:chr11:97511101	3_prime_UTR_variant	-
695	Srcin1:chr11:97525370	missense_variant	tolerated
696	Srcin1:chr11:97533763	synonymous_variant	-
697	Srcin1:chr11:97534864	missense_variant	tolerated
698	Mllt6:chr11:97676952	missense_variant	deleterious
699	Lasp1:chr11:97837709	3_prime_UTR_variant	-
700	Cacnb1:chr11:98001591	3_prime_UTR_variant	-
701	Rpl19:chr11:98028413	synonymous_variant	-
702	Stac2:chr11:98038013	missense_variant	deleterious
703	Fbxl20:chr11:98090699	missense_variant	deleterious
704	Psmd3:chr11:98693646	synonymous_variant	-
705	Psmd3:chr11:98695912	3_prime_UTR_variant	-
706	Med24:chr11:98716262	missense_variant	tolerated
707	Thra:chr11:98760980	synonymous_variant	-
708	Casc3:chr11:98821545	missense_variant	tolerated
709	Casc3:chr11:98821572	missense_variant	deleterious
710	Casc3:chr11:98822944	missense_variant	tolerated_low_confidence
711	Casc3:chr11:98829275	synonymous_variant	-
712	Rapgefl1:chr11:98846243	synonymous_variant	-
713	Rapgefl1:chr11:98851529	3_prime_UTR_variant	-
714	Calm1:chr12:100203690	synonymous_variant	-
715	Calm1:chr12:100206194	missense_variant	deleterious_low_confidence
716	Calm1:chr12:100208461	3_prime_UTR_variant	-
717	Calm1:chr12:100209239	3_prime_UTR_variant	-
718	Calm1:chr12:100209749	3_prime_UTR_variant	-
719	Ttc7b:chr12:100301058	3_prime_UTR_variant	-
720	Fbln5:chr12:101750564	3_prime_UTR_variant	-
721	Trip11:chr12:101894326	synonymous_variant	-
722	Ndufb1-ps:chr12:101969575	missense_variant	deleterious
723	Cpsf2:chr12:101997353	missense_variant	tolerated
724	Lgmn:chr12:102394505	3_prime_UTR_variant	-
725	Lgmn:chr12:102394562	3_prime_UTR_variant	-
726	Golga5:chr12:102487227	synonymous_variant	-
727	Chga:chr12:102555085	5_prime_UTR_variant	-
728	Itpk1:chr12:102623320	missense_variant	tolerated
729	Otub2:chr12:103401045	missense_variant	tolerated
730	Ddx24:chr12:103417499	synonymous_variant	-
731	Ddx24:chr12:103417585	missense_variant	tolerated
732	Ppp4r4:chr12:103596465	synonymous_variant	-
733	Serpina3n:chr12:104413771	3_prime_UTR_variant	-
734	Dicer1:chr12:104706923	missense_variant	tolerated
735	Clmn:chr12:104764668	3_prime_UTR_variant	-
736	Clmn:chr12:104771875	missense_variant	deleterious
737	D430019H16Rik:chr12:105489301	3_prime_UTR_variant	-
738	D430019H16Rik:chr12:105489309	3_prime_UTR_variant	-
739	D430019H16Rik:chr12:105489802	3_prime_UTR_variant	-
740	Atg2b:chr12:105617265	synonymous_variant	-
741	Atg2b:chr12:105617268	synonymous_variant	-
742	Cyp46a1:chr12:108361871	3_prime_UTR_variant	-
743	Eml1:chr12:108463569	missense_variant	deleterious
744	Evl:chr12:108648463	missense_variant	tolerated
745	Dlk1:chr12:109461469	3_prime_UTR_variant	-
746	Dlk1:chr12:109462287	3_prime_UTR_variant	-
747	Dync1h1:chr12:110666887	3_prime_UTR_variant	-
748	Dync1h1:chr12:110666921	3_prime_UTR_variant	-
749	Hsp90aa1:chr12:110692830	missense_variant	tolerated
750	Traf3:chr12:111263159	3_prime_UTR_variant	-
751	Eif5:chr12:111539674	missense_variant	tolerated
752	Eif5:chr12:111545248	3_prime_UTR_variant	-
753	Ckb:chr12:111669611	synonymous_variant	-
754	Ckb:chr12:111669643	missense_variant	deleterious
755	Ckb:chr12:111671547	missense_variant	deleterious
756	Bag5:chr12:111710154	missense_variant	tolerated
757	Klc1:chr12:111776983	missense_variant	deleterious
758	Tmem179:chr12:112500433	3_prime_UTR_variant	-
759	Inf2:chr12:112600057	missense_variant	deleterious
760	Inf2:chr12:112604744	synonymous_variant	-
761	Inf2:chr12:112611931	missense_variant	tolerated_low_confidence
762	Cep170b:chr12:112743497	missense_variant	tolerated
763	Jag2:chr12:112908612	3_prime_UTR_variant	-
764	Jag2:chr12:112908614	3_prime_UTR_variant	-
765	Pacs2:chr12:113059788	missense_variant	tolerated
766	Pacs2:chr12:113069355	synonymous_variant	-
767	Vsnl1:chr12:11326434	missense_variant	deleterious
768	Wdr60:chr12:116248004	synonymous_variant	-
769	Ptprn2:chr12:117184645	missense_variant	deleterious
770	Rapgef5:chr12:117756442	3_prime_UTR_variant	-
771	Nbas:chr12:13483987	synonymous_variant	-
772	Lratd1:chr12:14148011	3_prime_UTR_variant	-
773	Ntsr2:chr12:16659986	3_prime_UTR_variant	-
774	Rock2:chr12:16961718	missense_variant	tolerated
775	Pdia6:chr12:17274494	synonymous_variant	-
776	Nol10:chr12:17416783	missense_variant	tolerated
777	Nol10:chr12:17424702	missense_variant	tolerated
778	Itgb1bp1:chr12:21279502	5_prime_UTR_variant	-
779	Mboat2:chr12:24959064	synonymous_variant	-
780	Kidins220:chr12:25016937	missense_variant	tolerated
781	Id2:chr12:25095966	synonymous_variant	-
782	Adi1:chr12:28681024	missense_variant	deleterious
783	Trappc12:chr12:28692528	missense_variant	tolerated
784	Trappc12:chr12:28747004	synonymous_variant	-
785	Myt1l:chr12:29910853	missense_variant	deleterious
786	Nampt:chr12:32839208	missense_variant	tolerated
787	Sypl:chr12:32977501	3_prime_UTR_variant	-
788	Kif3c:chr12:3403620	3_prime_UTR_variant	-
789	Tspan13:chr12:36042341	5_prime_UTR_variant	-
790	Efr3b:chr12:3962623	3_prime_UTR_variant	-
791	Efr3b:chr12:3962725	3_prime_UTR_variant	-
792	Efr3b:chr12:3964577	3_prime_UTR_variant	-
793	Efr3b:chr12:3980461	missense_variant	tolerated
794	Dock4:chr12:40640415	synonymous_variant	-
795	Dnajc27:chr12:4106906	missense_variant	deleterious
796	Dnajc27:chr12:4110545	3_prime_UTR_variant	-
797	Ptrhd1:chr12:4238135	3_prime_UTR_variant	-
798	Ncoa1:chr12:4247627	3_prime_UTR_variant	-
799	Pnpla8:chr12:44296006	missense_variant	deleterious
800	Pnpla8:chr12:44313835	3_prime_UTR_variant	-
801	Nrcam:chr12:44537329	missense_variant	deleterious
802	Sf3b6:chr12:4817704	5_prime_UTR_variant	-
803	Fkbp1b:chr12:4833338	3_prime_UTR_variant	-
804	Fkbp1b:chr12:4833687	missense_variant	deleterious
805	Atad2b:chr12:5044808	3_prime_UTR_variant	-
806	Klhl29:chr12:5083927	synonymous_variant	-
807	Strn3:chr12:51650147	missense_variant	tolerated
808	Hectd1:chr12:51790532	missense_variant	tolerated
809	Sptssa:chr12:54645707	3_prime_UTR_variant	-
810	Eapp:chr12:54673140	3_prime_UTR_variant	-
811	Snx6:chr12:54746774	3_prime_UTR_variant	-
812	Cfl2:chr12:54862776	5_prime_UTR_variant	-
813	Ralgapa1:chr12:55712647	synonymous_variant	-
814	Brms1l:chr12:55836572	synonymous_variant	-
815	Foxa1:chr12:57541397	3_prime_UTR_variant	-
816	Prpf39:chr12:65056347	missense_variant	deleterious
817	Mdga2:chr12:66486764	missense_variant	deleterious
818	Klhdc2:chr12:69303924	missense_variant	tolerated
819	Atl1:chr12:69959185	missense_variant	tolerated
820	Trim9:chr12:70245422	3_prime_UTR_variant	-
821	Trim9:chr12:70347273	5_prime_UTR_variant	-
822	Actr10:chr12:70937944	5_prime_UTR_variant	-
823	Actr10:chr12:70962681	3_prime_UTR_variant	-
824	Daam1:chr12:71989038	synonymous_variant	-
825	Daam1:chr12:71991764	3_prime_UTR_variant	-
826	Rtn1:chr12:72212167	3_prime_UTR_variant	-
827	Pcnx4:chr12:72555523	missense_variant	deleterious
828	Dhrs7:chr12:72656385	missense_variant	deleterious
829	Mnat1:chr12:73272615	3_prime_UTR_variant	-
830	Snapc1:chr12:73970318	synonymous_variant	-
831	Ppp2r5e:chr12:75450969	3_prime_UTR_variant	-
832	Ppp2r5e:chr12:75453536	3_prime_UTR_variant	-
833	Ppp2r5e:chr12:75453659	3_prime_UTR_variant	-
834	Hspa2:chr12:76404960	missense_variant	deleterious_low_confidence
835	Sptb:chr12:76581115	3_prime_UTR_variant	-
836	Sptb:chr12:76581612	3_prime_UTR_variant	-
837	Sptb:chr12:76613092	synonymous_variant	-
838	Fut8:chr12:77393818	missense_variant	tolerated
839	Fut8:chr12:77475286	synonymous_variant	-
840	Gphn:chr12:78623382	missense_variant	deleterious
841	Atp6v1d:chr12:78845292	missense_variant	deleterious
842	Plekhh1:chr12:79062564	missense_variant	deleterious
843	Plekhh1:chr12:79067153	missense_variant	tolerated
844	Plekhh1:chr12:79071341	synonymous_variant	-
845	Plekhh1:chr12:79076774	missense_variant	deleterious
846	Plekhh1:chr12:79081602	3_prime_UTR_variant	-
847	Vti1b:chr12:79165055	missense_variant	deleterious
848	Dcaf5:chr12:80336003	3_prime_UTR_variant	-
849	Dcaf5:chr12:80336999	3_prime_UTR_variant	-
850	Dcaf5:chr12:80337607	3_prime_UTR_variant	-
851	Galnt16:chr12:80572439	synonymous_variant	-
852	Galnt16:chr12:80597175	missense_variant	tolerated
853	Synj2bp:chr12:81504579	missense_variant	deleterious
854	Ttc9:chr12:81663645	3_prime_UTR_variant	-
855	Ttc9:chr12:81664371	3_prime_UTR_variant	-
856	Ttc9:chr12:81664787	3_prime_UTR_variant	-
857	Pcnx:chr12:81919130	synonymous_variant	-
858	Pcnx:chr12:81975831	synonymous_variant	-
859	Pcnx:chr12:81975846	synonymous_variant	-
860	Pcnx:chr12:81993104	missense_variant	tolerated
861	Sipa1l1:chr12:82425111	synonymous_variant	-
862	Zfyve1:chr12:83550886	missense_variant	deleterious
863	Gm5436:chr12:84258554	non_coding_transcript_exon_variant	-
864	Rhob:chr12:8498568	3_prime_UTR_variant	-
865	Rhob:chr12:8499687	5_prime_UTR_variant	-
866	Ylpm1:chr12:85014008	synonymous_variant	-
867	Dlst:chr12:85130518	missense_variant	tolerated
868	Rps6kl1:chr12:85135999	3_prime_UTR_variant	-
869	Tmem63c:chr12:87089252	synonymous_variant	-
870	Snw1:chr12:87460461	missense_variant	deleterious
871	Pum2:chr12:8751357	3_prime_UTR_variant	-
872	Laptm4a:chr12:8922242	missense_variant	deleterious
873	Nrxn3:chr12:89533002	missense_variant	deleterious
874	Foxn3:chr12:99194513	3_prime_UTR_variant	-
875	Tdp1:chr12:99935082	missense_variant	deleterious
876	Pik3r1:chr13:101681870	3_prime_UTR_variant	-
877	Erbin:chr13:103822828	missense_variant	deleterious
878	Rgs7bp:chr13:104948908	3_prime_UTR_variant	-
879	Rab3c:chr13:110055307	3_prime_UTR_variant	-
880	Rab3c:chr13:110057151	3_prime_UTR_variant	-
881	Il6st:chr13:112503865	missense_variant	deleterious
882	Il6st:chr13:112504447	3_prime_UTR_variant	-
883	Il6st:chr13:112505574	3_prime_UTR_variant	-
884	Ryr2:chr13:11622911	missense_variant	deleterious
885	Parp8:chr13:116867087	missense_variant	deleterious
886	Nnt:chr13:119404641	missense_variant	deleterious_low_confidence
887	Gng4:chr13:13827540	3_prime_UTR_variant	-
888	Ggps1:chr13:14063293	5_prime_UTR_variant	-
889	Arid4b:chr13:14197722	missense_variant	deleterious_low_confidence
890	Cdk13:chr13:17718042	3_prime_UTR_variant	-
891	Rala:chr13:17893132	missense_variant	tolerated
892	Gm5628:chr13:17950575	non_coding_transcript_exon_variant	-
893	H2bc4:chr13:23692418	3_prime_UTR_variant	-
894	H1f2:chr13:23739885	3_prime_UTR_variant	-
895	BC005537:chr13:24809988	missense_variant	tolerated
896	D130043K22Rik:chr13:24856907	missense_variant	tolerated
897	D130043K22Rik:chr13:24901204	3_prime_UTR_variant	-
898	Gpld1:chr13:24958958	missense_variant	tolerated
899	Nrsn1:chr13:25252158	3_prime_UTR_variant	-
900	Wrnip1:chr13:32821975	missense_variant	tolerated
901	Tubb2a:chr13:34074573	synonymous_variant	-
902	Tubb2b:chr13:34127485	missense_variant	tolerated_low_confidence
903	Slc22a23:chr13:34181039	3_prime_UTR_variant	-
904	Slc22a23:chr13:34181223	3_prime_UTR_variant	-
905	Slc22a23:chr13:34183164	synonymous_variant	-
906	Prpf4b:chr13:34883414	synonymous_variant	-
907	Prpf4b:chr13:34896025	missense_variant	deleterious
908	Rreb1:chr13:37949315	3_prime_UTR_variant	-
909	Smim13:chr13:41275689	3_prime_UTR_variant	-
910	Tmem170b:chr13:41641130	3_prime_UTR_variant	-
911	Hivep1:chr13:42154846	synonymous_variant	-
912	Dtnbp1:chr13:44931084	synonymous_variant	-
913	Gmpr:chr13:45542554	missense_variant	tolerated
914	Fam120a:chr13:48891954	missense_variant	deleterious
915	Wnk2:chr13:49042706	synonymous_variant	-
916	Wnk2:chr13:49042730	stop_gained	-
917	Bicd2:chr13:49379793	synonymous_variant	-
918	Bicd2:chr13:49386884	3_prime_UTR_variant	-
919	Iars:chr13:49717989	missense_variant	tolerated
920	Spin1:chr13:51152005	3_prime_UTR_variant	-
921	Shc3:chr13:51431093	3_prime_UTR_variant	-
922	Secisbp2:chr13:51682019	synonymous_variant	-
923	Sema4d:chr13:51793573	5_prime_UTR_variant	-
924	Diras2:chr13:52504597	3_prime_UTR_variant	-
925	Diras2:chr13:52507268	3_prime_UTR_variant	-
926	Diras2:chr13:52507337	3_prime_UTR_variant	-
927	Cplx2:chr13:54378890	missense_variant	tolerated
928	Cplx2:chr13:54380401	3_prime_UTR_variant	-
929	Cplx2:chr13:54383429	3_prime_UTR_variant	-
930	Faf2:chr13:54650215	stop_gained	-
931	Rnf44:chr13:54679828	3_prime_UTR_variant	-
932	Rnf44:chr13:54681474	3_prime_UTR_variant	-
933	Rnf44:chr13:54683121	synonymous_variant	-
934	Gprin1:chr13:54739799	missense_variant	tolerated
935	Prelid1:chr13:55324593	missense_variant	tolerated
936	Lman2:chr13:55345547	3_prime_UTR_variant	-
937	Grk6:chr13:55450988	missense_variant	tolerated
938	Grk6:chr13:55451805	missense_variant	deleterious
939	Dbn1:chr13:55481674	missense_variant	deleterious
940	Pdlim7:chr13:55509022	missense_variant	deleterious
941	Ddx41:chr13:55531647	synonymous_variant	-
942	B230219D22Rik:chr13:55700274	3_prime_UTR_variant	-
943	Txndc15:chr13:55718210	synonymous_variant	-
944	Hnrnpa0:chr13:58127479	missense_variant	tolerated
945	Hnrnpa0:chr13:58127485	missense_variant	tolerated
946	Hnrnpa0:chr13:58127895	missense_variant	deleterious
947	Ubqln1:chr13:58176223	3_prime_UTR_variant	-
948	Ubqln1:chr13:58176902	3_prime_UTR_variant	-
949	Ubqln1:chr13:58177707	3_prime_UTR_variant	-
950	Ubqln1:chr13:58177729	3_prime_UTR_variant	-
951	Ubqln1:chr13:58177730	3_prime_UTR_variant	-
952	Ubqln1:chr13:58193312	synonymous_variant	-
953	Hnrnpk:chr13:58394685	missense_variant	tolerated
954	Hnrnpk:chr13:58396891	missense_variant	tolerated
955	Ntrk2:chr13:59128741	3_prime_UTR_variant	-
956	Agtpbp1:chr13:59497003	missense_variant	tolerated
957	Agtpbp1:chr13:59500168	missense_variant	tolerated
958	Isca1:chr13:59755907	3_prime_UTR_variant	-
959	Dapk1:chr13:60761723	synonymous_variant	-
960	Habp4:chr13:64161950	5_prime_UTR_variant	-
961	Habp4:chr13:64161977	5_prime_UTR_variant	-
962	Pitrm1:chr13:6558197	synonymous_variant	-
963	Pfkp:chr13:6588613	missense_variant	deleterious
964	Pfkp:chr13:6648586	missense_variant	deleterious
965	Ptdss1:chr13:66976799	missense_variant	deleterious
966	Adcy2:chr13:68620750	synonymous_variant	-
967	Adcy2:chr13:68625800	synonymous_variant	-
968	Tent4a:chr13:69498115	3_prime_UTR_variant	-
969	Ube2ql1:chr13:69703058	3_prime_UTR_variant	-
970	Ube2ql1:chr13:69738694	missense_variant	deleterious
971	Ube2ql1:chr13:69739110	synonymous_variant	-
972	Ube2ql1:chr13:69739170	synonymous_variant	-
973	Lpcat1:chr13:73516326	3_prime_UTR_variant	-
974	Slc6a3:chr13:73544846	missense_variant	tolerated
975	Slc6a3:chr13:73544875	missense_variant	tolerated
976	Slc6a3:chr13:73571603	missense_variant	deleterious
977	Slc12a7:chr13:73806122	missense_variant	deleterious
978	Tppp:chr13:74032017	3_prime_UTR_variant	-
979	Tppp:chr13:74035341	3_prime_UTR_variant	-
980	Exoc3:chr13:74172090	missense_variant	tolerated_low_confidence
981	Pcsk1:chr13:75090169	synonymous_variant	-
982	Pcsk1:chr13:75115324	missense_variant	tolerated
983	Gm4149:chr13:75644899	non_coding_transcript_exon_variant	-
984	Mctp1:chr13:76801524	synonymous_variant	-
985	Arrdc3:chr13:80890181	missense_variant	deleterious
986	Cox7c:chr13:86046782	5_prime_UTR_variant	-
987	Adarb2:chr13:8731912	missense_variant	deleterious
988	Ssbp2:chr13:91700932	3_prime_UTR_variant	-
989	Larp4b:chr13:9171929	3_prime_UTR_variant	-
990	Ankrd34b:chr13:92439519	missense_variant	tolerated
991	Mtx3:chr13:92854524	3_prime_UTR_variant	-
992	Mtx3:chr13:92857573	3_prime_UTR_variant	-
993	Zbed3:chr13:95336302	missense_variant	tolerated
994	F2r:chr13:95603555	3_prime_UTR_variant	-
995	Sv2c:chr13:95955952	3_prime_UTR_variant	-
996	Sv2c:chr13:95960607	3_prime_UTR_variant	-
997	Sv2c:chr13:96030527	missense_variant	deleterious
998	Dip2c:chr13:9604535	synonymous_variant	-
999	Sv2c:chr13:96088660	missense_variant	tolerated
1000	Col4a3bp:chr13:96603118	missense_variant	tolerated
1001	Col4a3bp:chr13:96612331	missense_variant	tolerated
1002	Hmgcr:chr13:96650551	3_prime_UTR_variant	-
1003	Dip2c:chr13:9666634	3_prime_UTR_variant	-
1004	Fam169a:chr13:97128159	3_prime_UTR_variant	-
1005	Enc1:chr13:97245489	stop_gained	-
1006	Enc1:chr13:97245787	synonymous_variant	-
1007	Enc1:chr13:97251923	3_prime_UTR_variant	-
1008	Btf3:chr13:98313180	synonymous_variant	-
1009	Map1b:chr13:99421880	3_prime_UTR_variant	-
1010	Map1b:chr13:99422031	3_prime_UTR_variant	-
1011	Map1b:chr13:99425400	3_prime_UTR_variant	-
1012	Map1b:chr13:99425893	synonymous_variant	-
1013	Map1b:chr13:99430231	missense_variant	tolerated
1014	Map1b:chr13:99431073	synonymous_variant	-
1015	Map1b:chr13:99431329	missense_variant	tolerated
1016	Map1b:chr13:99432087	missense_variant	tolerated
1017	Map1b:chr13:99432503	missense_variant	tolerated
1018	Map1b:chr13:99433433	missense_variant	deleterious
1019	Map1b:chr13:99433467	synonymous_variant	-
1020	Map1b:chr13:99434136	synonymous_variant	-
1021	Map1b:chr13:99434172	synonymous_variant	-
1022	Map1b:chr13:99508147	missense_variant	tolerated
1023	Mycbp2:chr14:103142753	synonymous_variant	-
1024	Mycbp2:chr14:103148608	synonymous_variant	-
1025	Mycbp2:chr14:103152253	missense_variant	deleterious
1026	Mycbp2:chr14:103156468	missense_variant	tolerated_low_confidence
1027	Mycbp2:chr14:103174893	missense_variant	deleterious
1028	Slain1:chr14:103703923	3_prime_UTR_variant	-
1029	Spry2:chr14:105893473	missense_variant	tolerated
1030	Slitrk1:chr14:108911209	missense_variant	tolerated
1031	Tpm3-rs7:chr14:113315336	missense_variant	deleterious
1032	Cldn10:chr14:118861837	missense_variant	deleterious
1033	Mbnl2:chr14:120431555	3_prime_UTR_variant	-
1034	Ipo5:chr14:120935237	missense_variant	deleterious
1035	Ipo5:chr14:120938862	missense_variant	deleterious
1036	Ipo5:chr14:120941703	synonymous_variant	-
1037	Stk24:chr14:121286457	3_prime_UTR_variant	-
1038	Dock9:chr14:121560630	missense_variant	deleterious
1039	Dock9:chr14:121605189	missense_variant	tolerated
1040	Ptprg:chr14:12166839	synonymous_variant	-
1041	Ubac2:chr14:121994461	synonymous_variant	-
1042	Tmtc4:chr14:122945538	synonymous_variant	-
1043	Nalcn:chr14:123278155	3_prime_UTR_variant	-
1044	Nalcn:chr14:123298051	stop_gained	-
1045	Nalcn:chr14:123317070	missense_variant	tolerated
1046	Cadps:chr14:12454178	synonymous_variant	-
1047	Psmd6:chr14:14116425	missense_variant	tolerated
1048	Top2b:chr14:16420413	missense_variant	tolerated
1049	Nr1d2:chr14:18205301	3_prime_UTR_variant	-
1050	Gng2:chr14:19875039	3_prime_UTR_variant	-
1051	Gng2:chr14:19875144	3_prime_UTR_variant	-
1052	Gng2:chr14:19875857	missense_variant	tolerated
1053	Usp54:chr14:20562063	missense_variant	deleterious_low_confidence
1054	Zswim8:chr14:20713117	synonymous_variant	-
1055	Zswim8:chr14:20721636	missense_variant	tolerated
1056	Zswim8:chr14:20721638	synonymous_variant	-
1057	Zswim8:chr14:20723303	stop_gained	-
1058	Ap3m1:chr14:21035847	3_prime_UTR_variant	-
1059	Zmiz1:chr14:25656063	missense_variant	deleterious
1060	Zmiz1:chr14:25666426	3_prime_UTR_variant	-
1061	Zcchc24:chr14:25714274	3_prime_UTR_variant	-
1062	Zcchc24:chr14:25715182	3_prime_UTR_variant	-
1063	Arhgef3:chr14:27401764	missense_variant	tolerated
1064	Arhgef3:chr14:27401924	missense_variant	tolerated_low_confidence
1065	Arhgef3:chr14:27401961	synonymous_variant	-
1066	Arhgef3:chr14:27402389	3_prime_UTR_variant	-
1067	Wnt5a:chr14:28505619	5_prime_UTR_variant	-
1068	Cacna1d:chr14:30051621	missense_variant	tolerated
1069	Itih3:chr14:30920698	missense_variant	tolerated
1070	Nek4:chr14:30977570	synonymous_variant	-
1071	Bap1:chr14:31259108	3_prime_UTR_variant	-
1072	Eaf1:chr14:31502441	missense_variant	deleterious
1073	Ankrd28:chr14:31699087	3_prime_UTR_variant	-
1074	Ankrd28:chr14:31710897	synonymous_variant	-
1075	Ankrd28:chr14:31711146	synonymous_variant	-
1076	Mapk8:chr14:33392962	missense_variant	deleterious
1077	Glud1:chr14:34343832	3_prime_UTR_variant	-
1078	Wapl:chr14:34729252	missense_variant	tolerated
1079	Wapl:chr14:34737313	missense_variant	tolerated
1080	Ccser2:chr14:36876636	3_prime_UTR_variant	-
1081	Ghitm:chr14:37122063	3_prime_UTR_variant	-
1082	Tspan14:chr14:40907367	3_prime_UTR_variant	-
1083	Prxl2a:chr14:40997798	missense_variant	deleterious
1084	Txndc16:chr14:45135703	3_prime_UTR_variant	-
1085	Psmc6:chr14:45346785	missense_variant	deleterious
1086	Fermt2:chr14:45469262	missense_variant	deleterious
1087	Fermt2:chr14:45504539	missense_variant	tolerated
1088	Ktn1:chr14:47726276	missense_variant	tolerated
1089	Gm3534:chr14:48409434	non_coding_transcript_exon_variant	-
1090	Ndrg2:chr14:51910761	missense_variant	deleterious
1091	Zfp219:chr14:52008925	synonymous_variant	-
1092	Sall2:chr14:52313020	missense_variant	tolerated
1093	Oxa1l:chr14:54361393	synonymous_variant	-
1094	Oxa1l:chr14:54363383	synonymous_variant	-
1095	Oxa1l:chr14:54366824	synonymous_variant	-
1096	Prmt5:chr14:54507668	3_prime_UTR_variant	-
1097	Prmt5:chr14:54511541	synonymous_variant	-
1098	Cdh24:chr14:54638909	missense_variant	tolerated
1099	Slc7a8:chr14:54723951	3_prime_UTR_variant	-
1100	Gm20521:chr14:54897197	missense_variant	deleterious_low_confidence
1101	Slc22a17:chr14:54906938	3_prime_UTR_variant	-
1102	Gm6852:chr14:55350522	non_coding_transcript_exon_variant	-
1103	Carmil3:chr14:55507541	synonymous_variant	-
1104	Mdp1:chr14:55660074	synonymous_variant	-
1105	Rabggta:chr14:55720932	missense_variant	tolerated
1106	Nynrin:chr14:55870766	missense_variant	deleterious_low_confidence
1107	Khnyn:chr14:55886999	missense_variant	deleterious
1108	Khnyn:chr14:55895654	3_prime_UTR_variant	-
1109	Gm4819:chr14:56250725	non_coding_transcript_exon_variant	-
1110	Pspc1:chr14:56748864	missense_variant	tolerated
1111	Zmym2:chr14:56950297	missense_variant	deleterious
1112	Gjb6:chr14:57124211	missense_variant	tolerated
1113	Gjb6:chr14:57124236	synonymous_variant	-
1114	Atp8a2:chr14:59640506	3_prime_UTR_variant	-
1115	Mtmr6:chr14:60301056	3_prime_UTR_variant	-
1116	Amer2:chr14:60387926	3_prime_UTR_variant	-
1117	Mir124a-1hg:chr14:64591583	non_coding_transcript_exon_variant	-
1118	Kif13b:chr14:64747026	synonymous_variant	-
1119	Extl3:chr14:65077709	missense_variant	deleterious_low_confidence
1120	Ccdc25:chr14:65866197	3_prime_UTR_variant	-
1121	Trim35:chr14:66297224	missense_variant	deleterious
1122	Trim35:chr14:66304030	missense_variant	tolerated
1123	Trim35:chr14:66304069	missense_variant	tolerated
1124	Trim35:chr14:66309290	missense_variant	deleterious
1125	Dpysl2:chr14:66803562	3_prime_UTR_variant	-
1126	Dpysl2:chr14:66803626	3_prime_UTR_variant	-
1127	Bnip3l:chr14:66985635	3_prime_UTR_variant	-
1128	Nefl:chr14:68084872	missense_variant	deleterious
1129	Nefm:chr14:68124136	synonymous_variant	-
1130	R3hcc1:chr14:69705252	missense_variant	tolerated
1131	Ccar2:chr14:70138370	3_prime_UTR_variant	-
1132	Bmp1:chr14:70492457	missense_variant	tolerated
1133	Lgi3:chr14:70536394	missense_variant	deleterious
1134	Hr:chr14:70555022	5_prime_UTR_variant	-
1135	Hr:chr14:70567879	stop_gained	-
1136	Hr:chr14:70572272	missense_variant	tolerated
1137	Gfra2:chr14:70979564	3_prime_UTR_variant	-
1138	Itm2b:chr14:73362455	3_prime_UTR_variant	-
1139	Itm2b:chr14:73362826	3_prime_UTR_variant	-
1140	Itm2b:chr14:73364559	missense_variant	deleterious
1141	Sucla2:chr14:73568981	missense_variant	tolerated
1142	Esd:chr14:74736007	missense_variant	deleterious
1143	Esd:chr14:74738481	missense_variant	tolerated
1144	Zc3h13:chr14:75323318	synonymous_variant	-
1145	Tpt1:chr14:75848162	3_prime_UTR_variant	-
1146	Akap11:chr14:78512483	synonymous_variant	-
1147	Akap11:chr14:78513468	missense_variant	tolerated
1148	Akap11:chr14:78514849	missense_variant	deleterious
1149	Pcdh8:chr14:79767571	missense_variant	tolerated
1150	Kctd6:chr14:8223350	3_prime_UTR_variant	-
1151	Fam107a:chr14:8296672	3_prime_UTR_variant	-
1152	Pcdh17:chr14:84448117	missense_variant	deleterious
1153	Pcdh17:chr14:84537440	3_prime_UTR_variant	-
1154	Gm9800:chr14:8800119	non_coding_transcript_exon_variant	-
1155	Mzt1:chr14:99046042	missense_variant	tolerated_low_confidence
1156	Dip2b:chr15:100215468	3_prime_UTR_variant	-
1157	Dip2b:chr15:100219016	3_prime_UTR_variant	-
1158	Pou6f1:chr15:100584068	missense_variant	deleterious
1159	Galnt6:chr15:100694587	missense_variant	tolerated
1160	Galnt6:chr15:100716198	missense_variant	tolerated
1161	Slc4a8:chr15:100789087	synonymous_variant	-
1162	Scn8a:chr15:100936444	synonymous_variant	-
1163	Scn8a:chr15:100974541	missense_variant	tolerated
1164	Scn8a:chr15:100983777	missense_variant	tolerated
1165	Scn8a:chr15:101002113	missense_variant	tolerated
1166	Spryd3:chr15:102130354	missense_variant	tolerated
1167	Sp1:chr15:102435249	3_prime_UTR_variant	-
1168	Calcoco1:chr15:102707074	3_prime_UTR_variant	-
1169	Prlr:chr15:10319313	synonymous_variant	-
1170	Zfr:chr15:12184799	3_prime_UTR_variant	-
1171	Drosha:chr15:12935083	synonymous_variant	-
1172	Basp1:chr15:25364717	missense_variant	tolerated
1173	Basp1:chr15:25364721	synonymous_variant	-
1174	Basp1:chr15:25364723	missense_variant	tolerated
1175	Zfp622:chr15:25991502	missense_variant	tolerated
1176	Trio:chr15:27765729	missense_variant	tolerated
1177	Trio:chr15:27854986	synonymous_variant	-
1178	Trio:chr15:27902715	missense_variant	deleterious
1179	Ctnnd2:chr15:30173042	5_prime_UTR_variant	-
1180	Ctnnd2:chr15:30887214	missense_variant	tolerated
1181	Marchf6:chr15:31459003	3_prime_UTR_variant	-
1182	Marchf6:chr15:31496095	synonymous_variant	-
1183	Cct5:chr15:31594492	missense_variant	deleterious
1184	Sema5a:chr15:32690860	3_prime_UTR_variant	-
1185	Selenop:chr15:3279326	synonymous_variant	-
1186	Tspyl5:chr15:33685086	3_prime_UTR_variant	-
1187	Vps13b:chr15:35910800	missense_variant	deleterious
1188	Pabpc1:chr15:36596971	missense_variant	tolerated
1189	Ncald:chr15:37366580	3_prime_UTR_variant	-
1190	Rrm2b:chr15:37925647	3_prime_UTR_variant	-
1191	Rims2:chr15:39679691	synonymous_variant	-
1192	Ebag9:chr15:44640359	missense_variant	tolerated
1193	Rpl37:chr15:5116653	5_prime_UTR_variant	-
1194	Rad21:chr15:51964055	3_prime_UTR_variant	-
1195	Samd12:chr15:53455127	3_prime_UTR_variant	-
1196	Tbc1d31:chr15:57953579	missense_variant	deleterious
1197	Tmem65:chr15:58783730	3_prime_UTR_variant	-
1198	Tmem65:chr15:58784284	3_prime_UTR_variant	-
1199	Mtss1:chr15:58942728	3_prime_UTR_variant	-
1200	Sqle:chr15:59315312	5_prime_UTR_variant	-
1201	Fam49b:chr15:63931118	3_prime_UTR_variant	-
1202	Efr3a:chr15:65787145	5_prime_UTR_variant	-
1203	Efr3a:chr15:65853006	missense_variant	tolerated
1204	Efr3a:chr15:65871979	3_prime_UTR_variant	-
1205	Kcnq3:chr15:65991308	3_prime_UTR_variant	-
1206	St3gal1:chr15:67105650	3_prime_UTR_variant	-
1207	Rictor:chr15:6787373	synonymous_variant	-
1208	Rictor:chr15:6797606	3_prime_UTR_variant	-
1209	Kcnk9:chr15:72509388	3_prime_UTR_variant	-
1210	Adgrb1:chr15:74516676	5_prime_UTR_variant	-
1211	Them6:chr15:74721672	stop_gained	-
1212	Lynx1:chr15:74749861	3_prime_UTR_variant	-
1213	Ly6h:chr15:75565186	missense_variant	tolerated
1214	Plec:chr15:76172771	missense_variant	deleterious
1215	Plec:chr15:76177661	missense_variant	tolerated
1216	Grina:chr15:76248349	missense_variant	deleterious
1217	Grina:chr15:76248847	missense_variant	deleterious
1218	Sharpin:chr15:76347727	missense_variant	deleterious
1219	Sharpin:chr15:76350818	5_prime_UTR_variant	-
1220	Bop1:chr15:76454194	missense_variant	tolerated
1221	Bop1:chr15:76474798	missense_variant	tolerated
1222	Scrt1:chr15:76518797	missense_variant	tolerated
1223	Vps28:chr15:76622143	3_prime_UTR_variant	-
1224	Lrrc24:chr15:76716113	synonymous_variant	-
1225	Zfp251:chr15:76853053	synonymous_variant	-
1226	Myh9:chr15:77789940	missense_variant	tolerated
1227	Cacng2:chr15:78013347	synonymous_variant	-
1228	Cyth4:chr15:78621945	3_prime_UTR_variant	-
1229	Gga1:chr15:78892066	synonymous_variant	-
1230	Ankrd54:chr15:79053579	3_prime_UTR_variant	-
1231	Sox10:chr15:79156585	missense_variant	tolerated
1232	Csnk1e:chr15:79419002	3_prime_UTR_variant	-
1233	Ddx17:chr15:79546201	missense_variant	deleterious
1234	Gtpbp1:chr15:79694221	missense_variant	tolerated
1235	Gtpbp1:chr15:79720217	3_prime_UTR_variant	-
1236	Gtpbp1:chr15:79720416	3_prime_UTR_variant	-
1237	Sun2:chr15:79739791	missense_variant	tolerated
1238	Npcd:chr15:79790338	synonymous_variant	-
1239	Cbx7:chr15:79916240	3_prime_UTR_variant	-
1240	Mgat3:chr15:80211109	missense_variant	tolerated_low_confidence
1241	Mgat3:chr15:80211368	missense_variant	tolerated_low_confidence
1242	Mgat3:chr15:80211681	synonymous_variant	-
1243	Mgat3:chr15:80212874	3_prime_UTR_variant	-
1244	Mgat3:chr15:80213339	3_prime_UTR_variant	-
1245	Mgat3:chr15:80213542	3_prime_UTR_variant	-
1246	Mgat3:chr15:80214378	3_prime_UTR_variant	-
1247	Mief1:chr15:80251239	3_prime_UTR_variant	-
1248	Atf4:chr15:80256326	missense_variant	deleterious_low_confidence
1249	Cacna1i:chr15:80397936	3_prime_UTR_variant	-
1250	St13:chr15:81366401	synonymous_variant	-
1251	Ep300:chr15:81628370	synonymous_variant	-
1252	Ep300:chr15:81649412	missense_variant	deleterious
1253	Ep300:chr15:81649773	synonymous_variant	-
1254	Rangap1:chr15:81705223	missense_variant	deleterious
1255	Zc3h7b:chr15:81768024	synonymous_variant	-
1256	Zc3h7b:chr15:81776794	missense_variant	tolerated
1257	Zc3h7b:chr15:81785949	synonymous_variant	-
1258	Zc3h7b:chr15:81796062	3_prime_UTR_variant	-
1259	Tef:chr15:81825048	3_prime_UTR_variant	-
1260	Tef:chr15:81826086	3_prime_UTR_variant	-
1261	Phf5a:chr15:81871887	5_prime_UTR_variant	-
1262	Csdc2:chr15:81950110	3_prime_UTR_variant	-
1263	Csdc2:chr15:81950346	3_prime_UTR_variant	-
1264	Srebf2:chr15:82182238	synonymous_variant	-
1265	Septin3:chr15:82284452	missense_variant	tolerated
1266	Cyp2d22:chr15:82371242	3_prime_UTR_variant	-
1267	Cplane1:chr15:8260594	missense_variant	tolerated
1268	Nipbl:chr15:8325717	synonymous_variant	-
1269	Ttll1:chr15:83483952	3_prime_UTR_variant	-
1270	Shisal1:chr15:84380102	3_prime_UTR_variant	-
1271	Shisal1:chr15:84380917	3_prime_UTR_variant	-
1272	Shisal1:chr15:84381051	3_prime_UTR_variant	-
1273	Shisal1:chr15:84381312	3_prime_UTR_variant	-
1274	Shisal1:chr15:84382948	3_prime_UTR_variant	-
1275	Shisal1:chr15:84383447	3_prime_UTR_variant	-
1276	Shisal1:chr15:84417141	missense_variant	deleterious
1277	Atxn10:chr15:85462331	missense_variant	tolerated
1278	Trmu:chr15:85897082	missense_variant	deleterious
1279	Brd1:chr15:88730547	synonymous_variant	-
1280	Pim3:chr15:88862901	missense_variant	deleterious
1281	Plxnb2:chr15:89165798	missense_variant	tolerated
1282	Ppp6r2:chr15:89253206	missense_variant	deleterious
1283	Gm5210:chr15:8928673	non_coding_transcript_exon_variant	-
1284	Sbf1:chr15:89300808	synonymous_variant	-
1285	Sbf1:chr15:89306644	missense_variant	tolerated
1286	Mapk8ip2:chr15:89458800	synonymous_variant	-
1287	Mapk8ip2:chr15:89461825	3_prime_UTR_variant	-
1288	Arsa:chr15:89472947	3_prime_UTR_variant	-
1289	Arsa:chr15:89473703	synonymous_variant	-
1290	Kif21a:chr15:90967285	missense_variant	deleterious
1291	Slc2a13:chr15:91272200	missense_variant	deleterious_low_confidence
1292	Slc2a13:chr15:91276463	missense_variant	tolerated
1293	Zcrb1:chr15:93387628	synonymous_variant	-
1294	Scaf11:chr15:96415048	missense_variant	deleterious
1295	Slc38a1:chr15:96573948	3_prime_UTR_variant	-
1296	Slc38a1:chr15:96576050	3_prime_UTR_variant	-
1297	Pced1b:chr15:97384369	synonymous_variant	-
1298	Slc48a1:chr15:97790647	stop_gained	-
1299	Slc48a1:chr15:97790696	synonymous_variant	-
1300	Slc48a1:chr15:97792340	3_prime_UTR_variant	-
1301	Pfkm:chr15:98122254	missense_variant	deleterious
1302	Zfp641:chr15:98287750	3_prime_UTR_variant	-
1303	Rnd1:chr15:98676524	synonymous_variant	-
1304	Kmt2d:chr15:98839301	missense_variant	tolerated
1305	Kmt2d:chr15:98846729	missense_variant	deleterious
1306	Kmt2d:chr15:98855813	synonymous_variant	-
1307	Tuba1a:chr15:98951231	missense_variant	deleterious_low_confidence
1308	Prpf40b:chr15:99306496	missense_variant	tolerated
1309	Tmbim6:chr15:99405884	missense_variant	deleterious
1310	Asic1:chr15:99700229	3_prime_UTR_variant	-
1311	Smarcd1:chr15:99709356	synonymous_variant	-
1312	Emp2:chr16:10282760	3_prime_UTR_variant	-
1313	Tekt5:chr16:10378999	synonymous_variant	-
1314	Clec16a:chr16:10614582	missense_variant	deleterious
1315	Snn:chr16:11072985	3_prime_UTR_variant	-
1316	Snn:chr16:11073229	3_prime_UTR_variant	-
1317	Snn:chr16:11073647	3_prime_UTR_variant	-
1318	Snn:chr16:11073778	3_prime_UTR_variant	-
1319	Snn:chr16:11073902	3_prime_UTR_variant	-
1320	Gspt1:chr16:11254059	5_prime_UTR_variant	-
1321	Pdxdc1:chr16:13902960	5_prime_UTR_variant	-
1322	Mpv17l:chr16:13948800	3_prime_UTR_variant	-
1323	Bmerb1:chr16:14100349	3_prime_UTR_variant	-
1324	Marf1:chr16:14126080	synonymous_variant	-
1325	Marf1:chr16:14153895	stop_gained	-
1326	Ppm1f:chr16:16926590	3_prime_UTR_variant	-
1327	Ppm1f:chr16:16926965	3_prime_UTR_variant	-
1328	Mapk1:chr16:17044564	3_prime_UTR_variant	-
1329	Mapk1:chr16:17045639	3_prime_UTR_variant	-
1330	Pi4ka:chr16:17309379	missense_variant	deleterious
1331	Pi4ka:chr16:17318319	missense_variant	deleterious
1332	Pi4ka:chr16:17376961	missense_variant	tolerated
1333	Thap7:chr16:17528551	synonymous_variant	-
1334	Gm20518:chr16:17858406	missense_variant	tolerated_low_confidence
1335	Map6d1:chr16:20234570	3_prime_UTR_variant	-
1336	Abcc5:chr16:20362206	synonymous_variant	-
1337	Abcc5:chr16:20405739	missense_variant	deleterious
1338	Eif2b5:chr16:20501405	missense_variant	tolerated
1339	Ece2:chr16:20639262	synonymous_variant	-
1340	Clcn2:chr16:20703141	3_prime_UTR_variant	-
1341	Clcn2:chr16:20709150	missense_variant	deleterious
1342	Vps8:chr16:21576750	synonymous_variant	-
1343	2510009E07Rik:chr16:21651462	3_prime_UTR_variant	-
1344	2510009E07Rik:chr16:21653398	missense_variant	deleterious_low_confidence
1345	Tbccd1:chr16:22813741	3_prime_UTR_variant	-
1346	St6gal1:chr16:23359576	3_prime_UTR_variant	-
1347	St6gal1:chr16:23359848	3_prime_UTR_variant	-
1348	Ccdc50:chr16:27450285	3_prime_UTR_variant	-
1349	Apod:chr16:31297353	synonymous_variant	-
1350	Apod:chr16:31311101	synonymous_variant	-
1351	Dlg1:chr16:31857927	missense_variant	deleterious
1352	Pigz:chr16:31944846	missense_variant	tolerated
1353	Cep19:chr16:32107434	3_prime_UTR_variant	-
1354	Fbxo45:chr16:32233012	3_prime_UTR_variant	-
1355	Pcyt1a:chr16:32470182	synonymous_variant	-
1356	Pcyt1a:chr16:32470190	missense_variant	tolerated
1357	Tfrc:chr16:32615302	synonymous_variant	-
1358	Tnk2:chr16:32680744	synonymous_variant	-
1359	Rubcn:chr16:32822602	3_prime_UTR_variant	-
1360	Rubcn:chr16:32823248	3_prime_UTR_variant	-
1361	Fyttd1:chr16:32906957	3_prime_UTR_variant	-
1362	Fyttd1:chr16:32907928	3_prime_UTR_variant	-
1363	Snx4:chr16:33299173	3_prime_UTR_variant	-
1364	Adcy5:chr16:35303989	3_prime_UTR_variant	-
1365	Adcy5:chr16:35304331	3_prime_UTR_variant	-
1366	Kpna1:chr16:36035869	3_prime_UTR_variant	-
1367	Golgb1:chr16:36916836	synonymous_variant	-
1368	Golgb1:chr16:36918755	synonymous_variant	-
1369	Lrrc58:chr16:37887594	3_prime_UTR_variant	-
1370	Adprh:chr16:38447428	missense_variant	deleterious
1371	Arhgap31:chr16:38603301	missense_variant	tolerated_low_confidence
1372	Lsamp:chr16:39984646	5_prime_UTR_variant	-
1373	Lsamp:chr16:42179737	3_prime_UTR_variant	-
1374	Atp6v1a:chr16:44109572	synonymous_variant	-
1375	Adcy9:chr16:4418904	synonymous_variant	-
1376	Adcy9:chr16:4418915	missense_variant	tolerated_low_confidence
1377	Tagln3:chr16:45722961	missense_variant	tolerated
1378	Nmral1:chr16:4713694	synonymous_variant	-
1379	Dzip3:chr16:48924538	3_prime_UTR_variant	-
1380	Cd47:chr16:49868028	missense_variant	tolerated
1381	Cd47:chr16:49911175	3_prime_UTR_variant	-
1382	Bbx:chr16:50193143	3_prime_UTR_variant	-
1383	Sec14l5:chr16:5182167	missense_variant	tolerated
1384	Sec14l5:chr16:5184310	3_prime_UTR_variant	-
1385	Sec14l5:chr16:5186493	3_prime_UTR_variant	-
1386	Alcam:chr16:52295078	missense_variant	tolerated
1387	Alcam:chr16:52305601	missense_variant	tolerated
1388	Alcam:chr16:52309830	missense_variant	tolerated
1389	Nxpe3:chr16:55844184	missense_variant	tolerated_low_confidence
1390	Tfg:chr16:56704477	missense_variant	tolerated
1391	Tbc1d23:chr16:57173074	synonymous_variant	-
1392	Nsun3:chr16:62734961	3_prime_UTR_variant	-
1393	Cadm2:chr16:66784798	missense_variant	deleterious
1394	Robo1:chr16:73035961	missense_variant	tolerated
1395	Hspa13:chr16:75765113	missense_variant	tolerated
1396	Jam2:chr16:84816283	missense_variant	deleterious
1397	App:chr16:84954592	3_prime_UTR_variant	-
1398	App:chr16:85079996	missense_variant	deleterious
1399	App:chr16:85103291	synonymous_variant	-
1400	Abat:chr16:8620184	3_prime_UTR_variant	-
1401	Abat:chr16:8620615	3_prime_UTR_variant	-
1402	Abat:chr16:8621052	3_prime_UTR_variant	-
1403	Hunk:chr16:90498999	3_prime_UTR_variant	-
1404	Synj1:chr16:90969278	missense_variant	deleterious
1405	Paxbp1:chr16:91036527	missense_variant	tolerated
1406	Olig1:chr16:91269933	synonymous_variant	-
1407	Olig1:chr16:91270361	missense_variant	deleterious
1408	Olig1:chr16:91270363	missense_variant	deleterious
1409	Olig1:chr16:91271253	3_prime_UTR_variant	-
1410	Clic6:chr16:92539517	missense_variant	deleterious
1411	Dop1b:chr16:93765510	missense_variant	deleterious
1412	Ttc3:chr16:94427884	synonymous_variant	-
1413	Ttc3:chr16:94432021	missense_variant	deleterious
1414	Dyrk1a:chr16:94686490	missense_variant	deleterious
1415	Ets2:chr16:95720370	3_prime_UTR_variant	-
1416	Get1:chr16:96157388	3_prime_UTR_variant	-
1417	Dscam:chr16:96593173	synonymous_variant	-
1418	Dscam:chr16:96678419	missense_variant	deleterious
1419	Qk:chr17:10216188	synonymous_variant	-
1420	Agpat4:chr17:12210317	missense_variant	tolerated
1421	Igf2r:chr17:12705724	missense_variant	deleterious
1422	Igf2r:chr17:12715973	missense_variant	tolerated
1423	Wtap:chr17:12983480	missense_variant	tolerated
1424	Afdn:chr17:13888967	missense_variant	deleterious_low_confidence
1425	Fam120b:chr17:15431822	3_prime_UTR_variant	-
1426	Rgmb:chr17:15821046	missense_variant	tolerated
1427	Lnpep:chr17:17522452	3_prime_UTR_variant	-
1428	Lnpep:chr17:17562768	stop_gained	-
1429	Ppp2r1a:chr17:20951401	missense_variant	deleterious
1430	Flywch1:chr17:23762201	missense_variant	tolerated
1431	Srrm2:chr17:23815613	synonymous_variant	-
1432	Srrm2:chr17:23815964	synonymous_variant	-
1433	Srrm2:chr17:23816559	missense_variant	tolerated_low_confidence
1434	Srrm2:chr17:23816560	missense_variant	tolerated_low_confidence
1435	Srrm2:chr17:23816624	synonymous_variant	-
1436	Srrm2:chr17:23819026	missense_variant	deleterious_low_confidence
1437	Srrm2:chr17:23819365	missense_variant	tolerated_low_confidence
1438	Elob:chr17:23828888	missense_variant	tolerated
1439	Atp6v0c:chr17:24164556	missense_variant	deleterious
1440	Tbc1d24:chr17:24175664	3_prime_UTR_variant	-
1441	Abca3:chr17:24409874	3_prime_UTR_variant	-
1442	Rnps1:chr17:24420342	missense_variant	tolerated_low_confidence
1443	Pgp:chr17:24470743	synonymous_variant	-
1444	Pgp:chr17:24470981	missense_variant	tolerated
1445	Caskin1:chr17:24506668	synonymous_variant	-
1446	Caskin1:chr17:24506765	missense_variant	tolerated
1447	Pkd1:chr17:24578885	synonymous_variant	-
1448	Pkd1:chr17:24590887	missense_variant	tolerated
1449	Tsc2:chr17:24625283	missense_variant	tolerated
1450	Zfp598:chr17:24677564	missense_variant	deleterious
1451	Tbl3:chr17:24701845	missense_variant	tolerated
1452	Hagh:chr17:24857564	missense_variant	deleterious
1453	Clcn7:chr17:25133436	5_prime_UTR_variant	-
1454	Cacna1h:chr17:25380275	missense_variant	deleterious
1455	Cacna1h:chr17:25391997	missense_variant	deleterious
1456	Sox8:chr17:25570187	synonymous_variant	-
1457	Rab11fip3:chr17:25990780	missense_variant	tolerated_low_confidence
1458	Rab11fip3:chr17:26067638	missense_variant	deleterious_low_confidence
1459	Ergic1:chr17:26656398	3_prime_UTR_variant	-
1460	Syngap1:chr17:26960446	missense_variant	tolerated
1461	Lemd2:chr17:27199417	missense_variant	tolerated
1462	Grm4:chr17:27438427	missense_variant	tolerated
1463	Nudt3:chr17:27579944	3_prime_UTR_variant	-
1464	Pacsin1:chr17:27705032	synonymous_variant	-
1465	Pacsin1:chr17:27705745	missense_variant	deleterious
1466	Pacsin1:chr17:27708476	missense_variant	deleterious
1467	Pacsin1:chr17:27708981	3_prime_UTR_variant	-
1468	Pacsin1:chr17:27710908	3_prime_UTR_variant	-
1469	Taf11:chr17:27905278	missense_variant	deleterious
1470	Zfp523:chr17:28195030	synonymous_variant	-
1471	Ppard:chr17:28300591	3_prime_UTR_variant	-
1472	Mapk14:chr17:28745026	synonymous_variant	-
1473	Mdga1:chr17:29828283	3_prime_UTR_variant	-
1474	Zfand3:chr17:30135468	synonymous_variant	-
1475	Wdr4:chr17:31496415	3_prime_UTR_variant	-
1476	Scaf8:chr17:3197377	missense_variant	tolerated_low_confidence
1477	Scaf8:chr17:3197703	synonymous_variant	-
1478	Brd4:chr17:32197604	3_prime_UTR_variant	-
1479	Brd4:chr17:32198974	missense_variant	deleterious
1480	Brd4:chr17:32224104	missense_variant	deleterious
1481	Akap8:chr17:32304284	3_prime_UTR_variant	-
1482	Akap8:chr17:32312303	synonymous_variant	-
1483	Akap8:chr17:32316211	synonymous_variant	-
1484	Akap8:chr17:32316212	missense_variant	tolerated
1485	Akap8:chr17:32316652	synonymous_variant	-
1486	Zfp871:chr17:32768245	3_prime_UTR_variant	-
1487	Cyp4f13:chr17:32929943	missense_variant	tolerated
1488	Rab11b:chr17:33747172	3_prime_UTR_variant	-
1489	Vps52:chr17:33960299	missense_variant	deleterious
1490	Slc39a7:chr17:34029646	missense_variant	deleterious
1491	Brd2:chr17:34112534	3_prime_UTR_variant	-
1492	Brd2:chr17:34115738	missense_variant	deleterious
1493	Rnf5:chr17:34601850	synonymous_variant	-
1494	Agpat1:chr17:34612692	3_prime_UTR_variant	-
1495	Fkbpl:chr17:34645837	missense_variant	deleterious
1496	Atf6b:chr17:34654748	3_prime_UTR_variant	-
1497	Skiv2l:chr17:34839445	missense_variant	deleterious
1498	Skiv2l:chr17:34842909	missense_variant	deleterious
1499	Vars:chr17:35010564	missense_variant	deleterious
1500	Prrc2a:chr17:35153066	missense_variant	tolerated
1501	Prrc2a:chr17:35154926	missense_variant	tolerated
1502	Prrc2a:chr17:35156374	missense_variant	deleterious
1503	Atp6v1g2:chr17:35238346	3_prime_UTR_variant	-
1504	Flot1:chr17:35829940	missense_variant	deleterious
1505	Ppp1r10:chr17:35929565	synonymous_variant	-
1506	Ppp1r10:chr17:35931623	3_prime_UTR_variant	-
1507	Gnl1:chr17:35981389	synonymous_variant	-
1508	CT010467.1:chr17:39847056	non_coding_transcript_exon_variant	-
1509	CT010467.1:chr17:39847233	non_coding_transcript_exon_variant	-
1510	CT010467.1:chr17:39847282	non_coding_transcript_exon_variant	-
1511	CT010467.1:chr17:39847565	non_coding_transcript_exon_variant	-
1512	CT010467.1:chr17:39848082	non_coding_transcript_exon_variant	-
1513	CT010467.2:chr17:39848437	non_coding_transcript_exon_variant	-
1514	Tnfrsf21:chr17:43016684	5_prime_UTR_variant	-
1515	Tnfrsf21:chr17:43065004	missense_variant	deleterious
1516	Tnfrsf21:chr17:43088597	3_prime_UTR_variant	-
1517	Adgrf5:chr17:43451086	missense_variant	deleterious
1518	Rcan2:chr17:44037629	3_prime_UTR_variant	-
1519	Rcan2:chr17:44038708	3_prime_UTR_variant	-
1520	Enpp5:chr17:44081008	missense_variant	tolerated
1521	Enpp5:chr17:44085482	synonymous_variant	-
1522	Enpp4:chr17:44102022	missense_variant	tolerated
1523	Cdc5l:chr17:45410803	missense_variant	deleterious
1524	Tmem151b:chr17:45542405	3_prime_UTR_variant	-
1525	Tmem151b:chr17:45542714	3_prime_UTR_variant	-
1526	Tmem63b:chr17:45660306	3_prime_UTR_variant	-
1527	Tmem63b:chr17:45661851	synonymous_variant	-
1528	Xpo5:chr17:46242669	3_prime_UTR_variant	-
1529	Ubr2:chr17:46930372	stop_gained	-
1530	Taf8:chr17:47494420	missense_variant	deleterious
1531	Plcl2:chr17:50607392	stop_gained	-
1532	Plcl2:chr17:50668051	synonymous_variant	-
1533	Rab5a:chr17:53479567	5_prime_UTR_variant	-
1534	Yju2:chr17:55967714	3_prime_UTR_variant	-
1535	Fsd1:chr17:55988755	missense_variant	tolerated
1536	Hdgfl2:chr17:56082322	synonymous_variant	-
1537	Sema6b:chr17:56130069	missense_variant	tolerated
1538	Plin3:chr17:56281412	missense_variant	tolerated
1539	Plin3:chr17:56284205	missense_variant	deleterious
1540	Ptprs:chr17:56419037	missense_variant	deleterious
1541	Ptprs:chr17:56436055	synonymous_variant	-
1542	Ranbp3:chr17:56711188	3_prime_UTR_variant	-
1543	Tubb4a:chr17:57080798	synonymous_variant	-
1544	Tubb4a:chr17:57080935	missense_variant	deleterious_low_confidence
1545	Tubb4a:chr17:57081295	missense_variant	deleterious_low_confidence
1546	Tubb4a:chr17:57086011	synonymous_variant	-
1547	Pja2:chr17:64282415	3_prime_UTR_variant	-
1548	Pja2:chr17:64308739	missense_variant	tolerated
1549	Epb41l3:chr17:69210296	synonymous_variant	-
1550	Epb41l3:chr17:69262307	synonymous_variant	-
1551	Ypel5:chr17:72848887	3_prime_UTR_variant	-
1552	Ehd3:chr17:73830069	missense_variant	tolerated
1553	Ehd3:chr17:73831804	3_prime_UTR_variant	-
1554	Dpy30:chr17:74299744	3_prime_UTR_variant	-
1555	Fam98a:chr17:75538833	missense_variant	tolerated
1556	Fam98a:chr17:75544818	synonymous_variant	-
1557	Fez2:chr17:78402785	missense_variant	deleterious
1558	Heatr5b:chr17:78762973	synonymous_variant	-
1559	Map4k3:chr17:80615111	synonymous_variant	-
1560	Slc8a1:chr17:81648237	synonymous_variant	-
1561	Eml4:chr17:83479564	3_prime_UTR_variant	-
1562	Mta3:chr17:83820245	3_prime_UTR_variant	-
1563	Lrpprc:chr17:84705317	3_prime_UTR_variant	-
1564	Slc3a1:chr17:85064123	3_prime_UTR_variant	-
1565	Prkce:chr17:86167970	5_prime_UTR_variant	-
1566	Prkce:chr17:86655692	3_prime_UTR_variant	-
1567	Epas1:chr17:86809750	missense_variant	deleterious
1568	Epas1:chr17:86831924	3_prime_UTR_variant	-
1569	Cript:chr17:87035114	3_prime_UTR_variant	-
1570	Gm5499:chr17:87078783	non_coding_transcript_exon_variant	-
1571	Calm2:chr17:87435818	missense_variant	deleterious_low_confidence
1572	Nrxn1:chr17:90035022	3_prime_UTR_variant	-
1573	Usp14:chr18:10004997	missense_variant	deleterious
1574	Usp14:chr18:10024600	synonymous_variant	-
1575	Mib1:chr18:10795833	stop_gained	-
1576	Riok3:chr18:12153020	missense_variant	deleterious
1577	Npc1:chr18:12190570	3_prime_UTR_variant	-
1578	Osbpl1a:chr18:12766828	missense_variant	deleterious
1579	Impact:chr18:12984309	synonymous_variant	-
1580	Impact:chr18:12991773	3_prime_UTR_variant	-
1581	Ss18:chr18:14625814	3_prime_UTR_variant	-
1582	Cdh2:chr18:16632330	synonymous_variant	-
1583	B4galt6:chr18:20685985	3_prime_UTR_variant	-
1584	B4galt6:chr18:20687812	3_prime_UTR_variant	-
1585	Mapre2:chr18:23883579	synonymous_variant	-
1586	Mapre2:chr18:23891374	3_prime_UTR_variant	-
1587	Slc39a6:chr18:24580190	3_prime_UTR_variant	-
1588	Elp2:chr18:24638496	synonymous_variant	-
1589	Fhod3:chr18:24903967	synonymous_variant	-
1590	Fhod3:chr18:25125784	synonymous_variant	-
1591	Celf4:chr18:25478493	3_prime_UTR_variant	-
1592	Celf4:chr18:25486951	missense_variant	deleterious
1593	Celf4:chr18:25496250	synonymous_variant	-
1594	Celf4:chr18:25504221	missense_variant	deleterious
1595	Rit2:chr18:30974825	3_prime_UTR_variant	-
1596	Sap130:chr18:31698672	synonymous_variant	-
1597	Wdr33:chr18:31878118	stop_gained	-
1598	Cul2:chr18:3423588	missense_variant	tolerated
1599	Apc:chr18:34310817	missense_variant	deleterious
1600	Apc:chr18:34312750	missense_variant	deleterious
1601	Apc:chr18:34314385	missense_variant	tolerated
1602	Apc:chr18:34314983	missense_variant	deleterious
1603	Apc:chr18:34317681	synonymous_variant	-
1604	Reep5:chr18:34345357	3_prime_UTR_variant	-
1605	Fam13b:chr18:34494244	missense_variant	deleterious
1606	Brd8:chr18:34605617	synonymous_variant	-
1607	Brd8:chr18:34606705	missense_variant	tolerated
1608	Brd8:chr18:34614503	missense_variant	tolerated
1609	Cdc23:chr18:34644057	synonymous_variant	-
1610	Hspa9:chr18:34938331	synonymous_variant	-
1611	Ctnna1:chr18:35222130	synonymous_variant	-
1612	Sil1:chr18:35325410	synonymous_variant	-
1613	Cxxc5:chr18:35858620	missense_variant	tolerated_low_confidence
1614	Cxxc5:chr18:35858626	missense_variant	deleterious_low_confidence
1615	Cxxc5:chr18:35858960	missense_variant	tolerated
1616	Cxxc5:chr18:35861078	3_prime_UTR_variant	-
1617	Ik:chr18:36748590	synonymous_variant	-
1618	Ik:chr18:36748695	synonymous_variant	-
1619	Hars:chr18:36771419	missense_variant	deleterious
1620	Dele1:chr18:38251330	missense_variant	deleterious_low_confidence
1621	Rnf14:chr18:38317596	3_prime_UTR_variant	-
1622	Gm4949:chr18:38360101	non_coding_transcript_exon_variant	-
1623	C030017B01Rik:chr18:40540202	non_coding_transcript_exon_variant	-
1624	Gm10557:chr18:4198498	non_coding_transcript_exon_variant	-
1625	Lars:chr18:42221607	synonymous_variant	-
1626	Dcp2:chr18:44421292	3_prime_UTR_variant	-
1627	Dcp2:chr18:44421381	3_prime_UTR_variant	-
1628	Kcnn2:chr18:45560122	5_prime_UTR_variant	-
1629	Kcnn2:chr18:45560215	missense_variant	deleterious_low_confidence
1630	Jcad:chr18:4649345	missense_variant	tolerated
1631	Tmed7:chr18:46593426	synonymous_variant	-
1632	Csnk1g3:chr18:53954457	3_prime_UTR_variant	-
1633	Gramd3:chr18:56485273	missense_variant	tolerated
1634	Megf10:chr18:57287873	missense_variant	deleterious
1635	Zeb1:chr18:5766517	missense_variant	deleterious
1636	Zeb1:chr18:5766518	missense_variant	deleterious
1637	Slc12a2:chr18:57946798	3_prime_UTR_variant	-
1638	Minar2:chr18:59076202	3_prime_UTR_variant	-
1639	Minar2:chr18:59076881	3_prime_UTR_variant	-
1640	Smim3:chr18:60474653	3_prime_UTR_variant	-
1641	Dctn4:chr18:60552917	missense_variant	tolerated
1642	Rbm22:chr18:60571094	synonymous_variant	-
1643	Rps14:chr18:60778497	synonymous_variant	-
1644	Camk2a:chr18:60980126	synonymous_variant	-
1645	Slc6a7:chr18:61009520	stop_gained	-
1646	Csnk1a1:chr18:61588548	3_prime_UTR_variant	-
1647	Kif5b:chr18:6241067	missense_variant	deleterious
1648	Fbxo38:chr18:62515487	missense_variant	tolerated_low_confidence
1649	Fbxo38:chr18:62536205	missense_variant	deleterious
1650	Txnl1:chr18:63662766	3_prime_UTR_variant	-
1651	Wdr7:chr18:63736430	missense_variant	tolerated
1652	Fech:chr18:64458120	missense_variant	tolerated
1653	Afg3l2:chr18:67423016	missense_variant	deleterious
1654	Afg3l2:chr18:67429136	missense_variant	tolerated
1655	Rab18:chr18:6784623	missense_variant	deleterious
1656	Rnmt:chr18:68324787	3_prime_UTR_variant	-
1657	Dcc:chr18:71258033	3_prime_UTR_variant	-
1658	Smad4:chr18:73662757	missense_variant	tolerated
1659	Elac1:chr18:73738316	3_prime_UTR_variant	-
1660	Mapk4:chr18:73928988	3_prime_UTR_variant	-
1661	Mapk4:chr18:73929297	3_prime_UTR_variant	-
1662	Acaa2:chr18:74805978	3_prime_UTR_variant	-
1663	Ctif:chr18:75435039	3_prime_UTR_variant	-
1664	Txnl4a:chr18:80222298	missense_variant	deleterious
1665	Mbp:chr18:82585006	3_prime_UTR_variant	-
1666	Mbp:chr18:82585033	3_prime_UTR_variant	-
1667	Mbp:chr18:82585034	3_prime_UTR_variant	-
1668	Mbp:chr18:82585574	3_prime_UTR_variant	-
1669	Gm50390:chr18:87851706	non_coding_transcript_exon_variant	-
1670	Thoc1:chr18:9994237	3_prime_UTR_variant	-
1671	Fads2:chr19:10065630	missense_variant	deleterious
1672	Tmem138:chr19:10575269	missense_variant	tolerated
1673	Ddb1:chr19:10629724	3_prime_UTR_variant	-
1674	Prpf19:chr19:10903407	stop_gained	-
1675	Mrpl16:chr19:11774582	synonymous_variant	-
1676	Patl1:chr19:11944145	3_prime_UTR_variant	-
1677	Patl1:chr19:11944840	3_prime_UTR_variant	-
1678	Psat1:chr19:15907003	missense_variant	tolerated
1679	Carnmt1:chr19:18706572	3_prime_UTR_variant	-
1680	Ldhb-ps:chr19:21937484	non_coding_transcript_exon_variant	-
1681	Trpm3:chr19:22766762	missense_variant	deleterious
1682	Trpm3:chr19:22897685	missense_variant	tolerated
1683	Klf9:chr19:23141763	synonymous_variant	-
1684	Klf9:chr19:23166083	3_prime_UTR_variant	-
1685	Klf9:chr19:23166785	3_prime_UTR_variant	-
1686	Ptar1:chr19:23720259	synonymous_variant	-
1687	Ptar1:chr19:23731311	3_prime_UTR_variant	-
1688	Apba1:chr19:23945914	3_prime_UTR_variant	-
1689	Apba1:chr19:23946937	3_prime_UTR_variant	-
1690	Apba1:chr19:23947373	3_prime_UTR_variant	-
1691	Kank1:chr19:25410744	missense_variant	deleterious
1692	Smarca2:chr19:26640534	missense_variant	tolerated
1693	Smarca2:chr19:26676682	missense_variant	deleterious
1694	Rfx3:chr19:27763938	3_prime_UTR_variant	-
1695	Ermp1:chr19:29612866	missense_variant	deleterious
1696	9930021J03Rik:chr19:29754681	synonymous_variant	-
1697	Il33:chr19:29960479	3_prime_UTR_variant	-
1698	Uhrf2:chr19:30075257	missense_variant	tolerated
1699	Uhrf2:chr19:30093593	3_prime_UTR_variant	-
1700	Asah2:chr19:32006339	synonymous_variant	-
1701	Pten:chr19:32820551	3_prime_UTR_variant	-
1702	Marchf5:chr19:37220335	missense_variant	tolerated
1703	Ide:chr19:37268942	3_prime_UTR_variant	-
1704	Sorbs1:chr19:40314651	missense_variant	deleterious
1705	Sorbs1:chr19:40324769	missense_variant	deleterious
1706	Gstp1:chr19:4035893	synonymous_variant	-
1707	Pitpnm1:chr19:4113569	missense_variant	tolerated
1708	Coro1b:chr19:4153384	missense_variant	deleterious
1709	Ppp1ca:chr19:4193121	missense_variant	deleterious_low_confidence
1710	Ppp1ca:chr19:4193220	missense_variant	deleterious_low_confidence
1711	Rad9a:chr19:4195364	3_prime_UTR_variant	-
1712	Zfyve27:chr19:42182716	stop_gained	-
1713	Zfyve27:chr19:42191184	3_prime_UTR_variant	-
1714	Zfyve27:chr19:42191536	3_prime_UTR_variant	-
1715	Golga7b:chr19:42256051	5_prime_UTR_variant	-
1716	Scd2:chr19:44304190	3_prime_UTR_variant	-
1717	Scd2:chr19:44304539	3_prime_UTR_variant	-
1718	Scd2:chr19:44305955	3_prime_UTR_variant	-
1719	Scd1:chr19:44396880	3_prime_UTR_variant	-
1720	Lzts2:chr19:45026826	3_prime_UTR_variant	-
1721	Sfxn3:chr19:45054977	3_prime_UTR_variant	-
1722	Sfxn3:chr19:45055653	3_prime_UTR_variant	-
1723	Sfxn3:chr19:45056006	3_prime_UTR_variant	-
1724	Pcx:chr19:4510555	5_prime_UTR_variant	-
1725	Gm17018:chr19:45577641	3_prime_UTR_variant	-
1726	Oga:chr19:45751894	3_prime_UTR_variant	-
1727	Oga:chr19:45778613	missense_variant	deleterious
1728	Pcx:chr19:4601689	synonymous_variant	-
1729	Gbf1:chr19:46279381	missense_variant	deleterious
1730	Arl3:chr19:46531325	3_prime_UTR_variant	-
1731	Ina:chr19:47014837	missense_variant	deleterious
1732	Ina:chr19:47024340	3_prime_UTR_variant	-
1733	Ina:chr19:47025189	3_prime_UTR_variant	-
1734	Neurl1a:chr19:47240009	missense_variant	deleterious
1735	Sptbn2:chr19:4738110	missense_variant	tolerated
1736	Sptbn2:chr19:4739967	missense_variant	deleterious
1737	Bbs1:chr19:4903875	missense_variant	tolerated
1738	Peli3:chr19:4929887	3_prime_UTR_variant	-
1739	Peli3:chr19:4929919	3_prime_UTR_variant	-
1740	Peli3:chr19:4930359	3_prime_UTR_variant	-
1741	B4gat1:chr19:5039687	stop_gained	-
1742	B4gat1:chr19:5039747	synonymous_variant	-
1743	B4gat1:chr19:5040659	3_prime_UTR_variant	-
1744	Rab1b:chr19:5100029	3_prime_UTR_variant	-
1745	Rab1b:chr19:5100503	missense_variant	deleterious
1746	Klc2:chr19:5111676	synonymous_variant	-
1747	Sf3b2:chr19:5287176	missense_variant	tolerated
1748	Xpnpep1:chr19:53011812	synonymous_variant	-
1749	Add3:chr19:53245180	missense_variant	tolerated
1750	Sart1:chr19:5381005	synonymous_variant	-
1751	Sart1:chr19:5384006	missense_variant	deleterious
1752	Sart1:chr19:5384016	synonymous_variant	-
1753	Pdcd4:chr19:53919663	missense_variant	tolerated
1754	Gpam:chr19:55083329	missense_variant	tolerated
1755	Zdhhc6:chr19:55311684	missense_variant	deleterious
1756	Zdhhc6:chr19:55314500	missense_variant	deleterious
1757	Vti1a:chr19:55328410	missense_variant	tolerated
1758	Ablim1:chr19:57036999	3_prime_UTR_variant	-
1759	Ablim1:chr19:57044912	missense_variant	deleterious
1760	Atrnl1:chr19:57611257	5_prime_UTR_variant	-
1761	Malat1:chr19:5801880	non_coding_transcript_exon_variant	-
1762	Atrnl1:chr19:58132068	3_prime_UTR_variant	-
1763	Atrnl1:chr19:58132277	3_prime_UTR_variant	-
1764	Gfra1:chr19:58237632	3_prime_UTR_variant	-
1765	Gfra1:chr19:58237664	3_prime_UTR_variant	-
1766	Gfra1:chr19:58300546	missense_variant	tolerated
1767	Hspa12a:chr19:58796904	3_prime_UTR_variant	-
1768	Hspa12a:chr19:58797466	3_prime_UTR_variant	-
1769	Hspa12a:chr19:58797469	3_prime_UTR_variant	-
1770	Hspa12a:chr19:58797478	3_prime_UTR_variant	-
1771	Hspa12a:chr19:58799600	missense_variant	tolerated
1772	Cdc42ep2:chr19:5918903	5_prime_UTR_variant	-
1773	Slc18a2:chr19:59284112	synonymous_variant	-
1774	Capn1:chr19:5997725	missense_variant	tolerated
1775	Cacul1:chr19:60525867	3_prime_UTR_variant	-
1776	Eif3a:chr19:60762100	stop_gained	-
1777	Arl2:chr19:6137530	missense_variant	tolerated
1778	Atg2a:chr19:6251333	synonymous_variant	-
1779	Ehd1:chr19:6281280	missense_variant	deleterious
1780	Ehd1:chr19:6281304	missense_variant	deleterious
1781	Map4k2:chr19:6346797	missense_variant	deleterious
1782	Sf1:chr19:6371352	missense_variant	deleterious
1783	Pygm:chr19:6393888	missense_variant	deleterious
1784	Nrxn2:chr19:6481196	missense_variant	deleterious
1785	Nrxn2:chr19:6481304	missense_variant	deleterious
1786	Nrxn2:chr19:6490600	missense_variant	tolerated
1787	Esrra:chr19:6911242	3_prime_UTR_variant	-
1788	Stip1:chr19:7021144	synonymous_variant	-
1789	Otub1:chr19:7199073	missense_variant	deleterious
1790	Otub1:chr19:7199156	synonymous_variant	-
1791	Cox8a:chr19:7217407	missense_variant	deleterious
1792	Cox8a:chr19:7217473	missense_variant	deleterious
1793	Cox8a:chr19:7217578	5_prime_UTR_variant	-
1794	Tmem179b:chr19:8772635	3_prime_UTR_variant	-
1795	Ganab:chr19:8915229	synonymous_variant	-
1796	Asrgl1:chr19:9110133	3_prime_UTR_variant	-
1797	Trim44:chr2:102300641	3_prime_UTR_variant	-
1798	Trim44:chr2:102303849	3_prime_UTR_variant	-
1799	Slc1a2:chr2:102658842	5_prime_UTR_variant	-
1800	Slc1a2:chr2:102736039	missense_variant	tolerated
1801	Slc1a2:chr2:102783476	3_prime_UTR_variant	-
1802	Slc1a2:chr2:102783561	3_prime_UTR_variant	-
1803	Cat:chr2:103454566	3_prime_UTR_variant	-
1804	Cat:chr2:103454587	3_prime_UTR_variant	-
1805	Caprin1:chr2:103766367	3_prime_UTR_variant	-
1806	Caprin1:chr2:103766732	3_prime_UTR_variant	-
1807	Caprin1:chr2:103779198	synonymous_variant	-
1808	4931422A03Rik:chr2:104027899	5_prime_UTR_variant	-
1809	D430041D05Rik:chr2:104252626	missense_variant	tolerated
1810	Gm13904:chr2:107011208	non_coding_transcript_exon_variant	-
1811	Hadhb-ps:chr2:108949198	non_coding_transcript_exon_variant	-
1812	Lin7c:chr2:109896369	missense_variant	tolerated
1813	Lin7c:chr2:109900381	3_prime_UTR_variant	-
1814	Emc7:chr2:112462875	missense_variant	deleterious
1815	Emc7:chr2:112470227	3_prime_UTR_variant	-
1816	Prkcq:chr2:11300351	3_prime_UTR_variant	-
1817	Scg5:chr2:113776371	3_prime_UTR_variant	-
1818	Gm13292:chr2:11409076	non_coding_transcript_exon_variant	-
1819	Fam98b:chr2:117267936	missense_variant	deleterious
1820	Fbh1:chr2:11742681	3_prime_UTR_variant	-
1821	Srp14:chr2:118476049	3_prime_UTR_variant	-
1822	Inafm2:chr2:118746756	3_prime_UTR_variant	-
1823	Disp2:chr2:118786178	synonymous_variant	-
1824	Disp2:chr2:118787635	missense_variant	deleterious
1825	Ivd:chr2:118877703	missense_variant	deleterious
1826	Vps18:chr2:119297192	missense_variant	tolerated
1827	Chp1:chr2:119547842	5_prime_UTR_variant	-
1828	Oip5os1:chr2:119594387	non_coding_transcript_exon_variant	-
1829	Oip5os1:chr2:119602499	non_coding_transcript_exon_variant	-
1830	Rtf1:chr2:119727609	synonymous_variant	-
1831	Rtf1:chr2:119733787	3_prime_UTR_variant	-
1832	Mapkbp1:chr2:120011998	synonymous_variant	-
1833	Zfp106:chr2:120520472	missense_variant	tolerated
1834	Zfp106:chr2:120527020	synonymous_variant	-
1835	Ttbk2:chr2:120748747	synonymous_variant	-
1836	Ttbk2:chr2:120748861	synonymous_variant	-
1837	Ubr1:chr2:120882241	missense_variant	deleterious
1838	Ubr1:chr2:120947772	missense_variant	tolerated
1839	Adal:chr2:121156641	3_prime_UTR_variant	-
1840	Trp53bp1:chr2:121208038	missense_variant	tolerated
1841	Ppip5k1:chr2:121310603	3_prime_UTR_variant	-
1842	Ppip5k1:chr2:121337850	synonymous_variant	-
1843	Ppip5k1:chr2:121342973	synonymous_variant	-
1844	Pdia3:chr2:121437764	3_prime_UTR_variant	-
1845	Frmd5:chr2:121545658	3_prime_UTR_variant	-
1846	Casc4:chr2:121911965	synonymous_variant	-
1847	Casc4:chr2:121912034	synonymous_variant	-
1848	Casc4:chr2:121935224	3_prime_UTR_variant	-
1849	Gatm:chr2:122611196	synonymous_variant	-
1850	Sema6d:chr2:124664700	synonymous_variant	-
1851	Fbn1:chr2:125314726	missense_variant	tolerated
1852	Secisbp2l:chr2:125739396	3_prime_UTR_variant	-
1853	Secisbp2l:chr2:125740882	missense_variant	tolerated
1854	Cops2:chr2:125832075	3_prime_UTR_variant	-
1855	Snrnp200:chr2:127210805	synonymous_variant	-
1856	Snrnp200:chr2:127231763	synonymous_variant	-
1857	Tmem127:chr2:127258841	3_prime_UTR_variant	-
1858	Tmem127:chr2:127259199	3_prime_UTR_variant	-
1859	Stard7:chr2:127298245	3_prime_UTR_variant	-
1860	Kcnip3:chr2:127510917	missense_variant	tolerated
1861	Mrps5:chr2:127605727	3_prime_UTR_variant	-
1862	Tmem87b:chr2:128841289	missense_variant	deleterious
1863	Polr1b:chr2:129119173	missense_variant	deleterious
1864	Vps16:chr2:130441841	synonymous_variant	-
1865	Ptpra:chr2:130519465	missense_variant	tolerated
1866	Mrps26:chr2:130568268	3_prime_UTR_variant	-
1867	4930402H24Rik:chr2:130707503	3_prime_UTR_variant	-
1868	Atrn:chr2:131027189	3_prime_UTR_variant	-
1869	Atrn:chr2:131027349	3_prime_UTR_variant	-
1870	Atrn:chr2:131028509	3_prime_UTR_variant	-
1871	Rassf2:chr2:131994640	3_prime_UTR_variant	-
1872	Rassf2:chr2:132004348	missense_variant	tolerated
1873	Slc23a2:chr2:132052909	3_prime_UTR_variant	-
1874	Cds2:chr2:132306560	3_prime_UTR_variant	-
1875	Cds2:chr2:132306883	3_prime_UTR_variant	-
1876	Cds2:chr2:132308558	3_prime_UTR_variant	-
1877	Cds2:chr2:132309957	3_prime_UTR_variant	-
1878	Cds2:chr2:132311308	3_prime_UTR_variant	-
1879	Cds2:chr2:132311472	3_prime_UTR_variant	-
1880	Trmt6:chr2:132809837	missense_variant	deleterious
1881	Tmx4:chr2:134597830	3_prime_UTR_variant	-
1882	Tmx4:chr2:134598733	missense_variant	tolerated
1883	Plcb4:chr2:136013766	3_prime_UTR_variant	-
1884	Snap25:chr2:136781289	3_prime_UTR_variant	-
1885	Pcsk2:chr2:143801093	missense_variant	tolerated
1886	Pcsk2:chr2:143813588	missense_variant	tolerated
1887	Dtd1:chr2:144603815	missense_variant	deleterious
1888	Slc24a3:chr2:145640280	synonymous_variant	-
1889	Naa20:chr2:145911745	missense_variant	deleterious
1890	Foxa2:chr2:148043327	3_prime_UTR_variant	-
1891	Gzf1:chr2:148692247	3_prime_UTR_variant	-
1892	Gm14130:chr2:149743947	non_coding_transcript_exon_variant	-
1893	Gm14130:chr2:149744030	non_coding_transcript_exon_variant	-
1894	Apmap:chr2:150588942	missense_variant	deleterious
1895	Pygb:chr2:150808842	missense_variant	deleterious
1896	Abhd12:chr2:150832923	3_prime_UTR_variant	-
1897	Abhd12:chr2:150834378	missense_variant	tolerated
1898	Abhd12:chr2:150904596	5_prime_UTR_variant	-
1899	Fkbp1a:chr2:151542690	5_prime_UTR_variant	-
1900	Fkbp1a:chr2:151542693	5_prime_UTR_variant	-
1901	Fkbp1a:chr2:151542696	5_prime_UTR_variant	-
1902	Fkbp1a:chr2:151542702	5_prime_UTR_variant	-
1903	Csnk2a1:chr2:152281617	3_prime_UTR_variant	-
1904	Tbc1d20:chr2:152310488	synonymous_variant	-
1905	Tbc1d20:chr2:152313686	3_prime_UTR_variant	-
1906	Tbc1d20:chr2:152313712	3_prime_UTR_variant	-
1907	Id1:chr2:152737133	3_prime_UTR_variant	-
1908	Pdrg1:chr2:153009680	missense_variant	tolerated
1909	Chmp4b:chr2:154694399	3_prime_UTR_variant	-
1910	Itch:chr2:155192190	stop_gained	-
1911	Dynlrb1:chr2:155247852	missense_variant	tolerated
1912	Map1lc3a:chr2:155278062	3_prime_UTR_variant	-
1913	Ncoa6:chr2:155406105	missense_variant	tolerated
1914	Cep250:chr2:155989567	missense_variant	tolerated
1915	Ergic3:chr2:156016787	missense_variant	tolerated
1916	Rbm39:chr2:156179940	5_prime_UTR_variant	-
1917	Rbm39:chr2:156179946	5_prime_UTR_variant	-
1918	Phf20:chr2:156302891	synonymous_variant	-
1919	2900097C17Rik:chr2:156390300	non_coding_transcript_exon_variant	-
1920	Epb41l1:chr2:156503668	missense_variant	deleterious
1921	Epb41l1:chr2:156509218	missense_variant	deleterious
1922	Epb41l1:chr2:156540380	3_prime_UTR_variant	-
1923	Dlgap4:chr2:156701322	missense_variant	tolerated
1924	Dlgap4:chr2:156763477	3_prime_UTR_variant	-
1925	Dlgap4:chr2:156763779	3_prime_UTR_variant	-
1926	Ndrg3:chr2:156928380	3_prime_UTR_variant	-
1927	Soga1:chr2:157040677	missense_variant	tolerated
1928	Src:chr2:157471567	3_prime_UTR_variant	-
1929	Vstm2l:chr2:157943919	synonymous_variant	-
1930	Snhg11:chr2:158381022	3_prime_UTR_variant	-
1931	Snhg11:chr2:158381125	3_prime_UTR_variant	-
1932	Snhg11:chr2:158381800	3_prime_UTR_variant	-
1933	Snhg11:chr2:158385402	3_prime_UTR_variant	-
1934	Ralgapb:chr2:158454225	synonymous_variant	-
1935	Slc32a1:chr2:158611347	missense_variant	tolerated
1936	Slc32a1:chr2:158611452	missense_variant	tolerated
1937	Slc32a1:chr2:158614552	missense_variant	tolerated
1938	Slc32a1:chr2:158614786	missense_variant	tolerated
1939	Slc32a1:chr2:158614975	missense_variant	tolerated
1940	Ppp1r16b:chr2:158762053	3_prime_UTR_variant	-
1941	L3mbtl1:chr2:162970275	missense_variant	deleterious
1942	Gdap1l1:chr2:163453853	missense_variant	tolerated
1943	Dbndd2:chr2:164490199	missense_variant	tolerated
1944	Pigt:chr2:164507964	3_prime_UTR_variant	-
1945	Pcif1:chr2:164884412	missense_variant	tolerated
1946	Pcif1:chr2:164891340	3_prime_UTR_variant	-
1947	Zfp335:chr2:164893292	missense_variant	deleterious
1948	Zfp335:chr2:164902681	synonymous_variant	-
1949	Slc12a5:chr2:164973762	missense_variant	tolerated
1950	Ncoa5:chr2:165002676	synonymous_variant	-
1951	Ncoa5:chr2:165013067	missense_variant	deleterious_low_confidence
1952	Cdh22:chr2:165170798	synonymous_variant	-
1953	Slc35c2:chr2:165282811	synonymous_variant	-
1954	Zfp334:chr2:165381543	synonymous_variant	-
1955	Sulf2:chr2:166083872	missense_variant	deleterious
1956	Arfgef2:chr2:166859364	missense_variant	deleterious
1957	Arfgef2:chr2:166895080	3_prime_UTR_variant	-
1958	Znfx1:chr2:167038492	synonymous_variant	-
1959	Znfx1:chr2:167038963	missense_variant	deleterious
1960	B4galt5:chr2:167306622	missense_variant	deleterious
1961	Atp9a:chr2:168661948	missense_variant	deleterious
1962	Gm14303:chr2:172509527	non_coding_transcript_exon_variant	-
1963	Gm14303:chr2:172509625	non_coding_transcript_exon_variant	-
1964	Rae1:chr2:173015357	synonymous_variant	-
1965	Nebl:chr2:17347106	3_prime_UTR_variant	-
1966	Nebl:chr2:17350738	synonymous_variant	-
1967	Vapb:chr2:173780437	3_prime_UTR_variant	-
1968	Vamp7-ps:chr2:174046860	non_coding_transcript_exon_variant	-
1969	Stx16:chr2:174093450	synonymous_variant	-
1970	Gm20721:chr2:174341820	missense_variant	tolerated_low_confidence
1971	Gm20721:chr2:174341823	missense_variant	deleterious_low_confidence
1972	Gm20721:chr2:174345476	missense_variant	tolerated_low_confidence
1973	Gm20721:chr2:174345479	missense_variant	tolerated_low_confidence
1974	Gm20721:chr2:174346319	missense_variant	deleterious_low_confidence
1975	Gm20721:chr2:174346368	5_prime_UTR_variant	-
1976	Gm20721:chr2:174346370	5_prime_UTR_variant	-
1977	Gm20721:chr2:174346468	5_prime_UTR_variant	-
1978	Nelfcd:chr2:174422636	missense_variant	tolerated
1979	Phactr3:chr2:178256167	missense_variant	deleterious
1980	Phactr3:chr2:178284013	synonymous_variant	-
1981	Phactr3:chr2:178335809	3_prime_UTR_variant	-
1982	Phactr3:chr2:178335810	3_prime_UTR_variant	-
1983	Ss18l1:chr2:180055794	missense_variant	deleterious_low_confidence
1984	Ss18l1:chr2:180062023	missense_variant	tolerated_low_confidence
1985	Ss18l1:chr2:180069436	3_prime_UTR_variant	-
1986	Ss18l1:chr2:180069448	3_prime_UTR_variant	-
1987	Dido1:chr2:180687726	missense_variant	deleterious
1988	Ythdf1:chr2:180911189	stop_gained	-
1989	Arfgap1:chr2:180971097	missense_variant	tolerated
1990	Arfgap1:chr2:180981266	missense_variant	tolerated_low_confidence
1991	Eef1a2:chr2:181153688	missense_variant	deleterious_low_confidence
1992	Zgpat:chr2:181380146	missense_variant	deleterious
1993	Dnajc5:chr2:181547470	missense_variant	deleterious
1994	Dnajc5:chr2:181552533	3_prime_UTR_variant	-
1995	Dnajc5:chr2:181552743	3_prime_UTR_variant	-
1996	Oprl1:chr2:181719281	missense_variant	tolerated
1997	Pip4k2a:chr2:18843902	3_prime_UTR_variant	-
1998	Gad2:chr2:22690327	missense_variant	deleterious
[truncated: 1,814 more rows]

## Sheet: Table S2
Table S2. Differential G-to-A RNA editing events between controls and CSDS.
No.	G-to-A RNA editing events	Mean of editing levels (%)			Consequence	SIFT	P*	Associated with psychitric diseases**	Associated with neurological diseases
		PS	ES	difference
1	Fat1:chr8:45026388	2.83667	0	-2.83667	missense_variant	deleterious	8.72045e-10	Yes
2	Trnp1:chr4:133497722	1.27333	0	-1.27333	3_prime_UTR_variant	-	1.73041e-05
3	Ptma:chr1:86529182	2.91667	0	-2.91667	missense_variant	tolerated	3.39969e-05
4	Capza2:chr6:17666540	1.9	0	-1.9	3_prime_UTR_variant	-	0.000103336
5	Fat1:chr8:45025105	2.85	0	-2.85	missense_variant	deleterious	0.000331983	Yes
6	Snn:chr16:11073902	1.43667	0	-1.43667	3_prime_UTR_variant	-	0.000701443
7	Tbc1d10b:chr7:127198007	2.93667	0.401667	-2.535	3_prime_UTR_variant	-	0.000717857
8	Dennd5b:chr6:149009839	2.77333	0	-2.77333	synonymous_variant	-	0.000813736
9	Zscan18:chr7:12769473	7.02667	1.21167	-5.815	missense_variant	tolerated	0.00150684
10	Zim1:chr7:6673498	3.55	0	-3.55	3_prime_UTR_variant	-	0.00233373
11	Arhgef12:chr9:42967238	1.73667	0.171667	-1.565	3_prime_UTR_variant	-	0.00314363
12	Gls:chr1:52163644	2.42667	0.6	-1.82667	3_prime_UTR_variant	-	0.00321846	Yes
13	Slc6a1:chr6:114316424	1.19667	4.39833	3.20167	3_prime_UTR_variant	-	0.00362862	Yes
14	Deaf1:chr7:141297412	1.86667	0.241667	-1.625	3_prime_UTR_variant	-	0.00374579
15	Hpca:chr4:129112384	1.59667	0.186667	-1.41	3_prime_UTR_variant	-	0.00404052
16	Oprl1:chr2:181719281	2.94	0.978333	-1.96167	missense_variant	tolerated	0.00407569	Yes	Yes
17	Gnptab:chr10:88436174	2.22	0.245	-1.975	missense_variant	tolerated	0.00488602
18	Arfgef3:chr10:18585293	1.88667	0.256667	-1.63	3_prime_UTR_variant	-	0.00489649
19	Scap:chr9:110380556	2.48667	0.278333	-2.20833	missense_variant	deleterious	0.00517694		Yes
20	Macir:chr1:97644577	4.19667	0.476667	-3.72	3_prime_UTR_variant	-	0.00534713	Yes
21	Oxa1l:chr14:54363383	2.39333	0.26	-2.13333	synonymous_variant	-	0.0058643		Yes
22	Rnf6:chr5:146211712	3.92333	1.17833	-2.745	synonymous_variant	-	0.00652703
23	Plxnb3:chrX:73766107	2.20333	0.435	-1.76833	missense_variant	tolerated	0.00673397
24	Chd3:chr11:69361687	1.52333	0.316667	-1.20667	missense_variant	tolerated_low_confidence	0.00782615
25	Trim2:chr3:84190826	0	1.25167	1.25167	synonymous_variant	-	0.00803843
26	Apod:chr16:31297353	0.253333	2.49	2.23667	synonymous_variant	-	0.00818163	Yes	Yes
27	Ttyh2:chr11:114720186	5.33333	1.75333	-3.58	3_prime_UTR_variant	-	0.00819846	Yes
28	Atp6v1b2:chr8:69103735	1.8	0.676667	-1.12333	synonymous_variant	-	0.00871513	Yes
29	Ganab:chr19:8915229	1.52667	0.205	-1.32167	synonymous_variant	-	0.00888075
30	Kpna6:chr4:129646778	4.88667	1.54	-3.34667	3_prime_UTR_variant	-	0.00888787
31	Sort1:chr3:108338908	2.75333	0.211667	-2.54167	synonymous_variant	-	0.00899956	Yes	Yes
32	Srebf1:chr11:60199707	2.66667	0.32	-2.34667	3_prime_UTR_variant	-	0.00916565	Yes	Yes
33	Nktr:chr9:121748830	4.43333	0.921667	-3.51167	missense_variant	deleterious_low_confidence	0.0103042
34	Cacna1i:chr15:80397936	7.60333	0.976667	-6.62667	3_prime_UTR_variant	-	0.0104095		Yes
35	Slc25a25:chr2:32421320	0	1.90333	1.90333	synonymous_variant	-	0.0105854
36	Smc1a:chrX:152046704	2.27333	0.315	-1.95833	synonymous_variant	-	0.0106179
37	Peli3:chr19:4929887	0	2.74833	2.74833	3_prime_UTR_variant	-	0.0116098
38	Sv2b:chr7:75117305	1.96667	0.245	-1.72167	3_prime_UTR_variant	-	0.0120199	Yes	Yes
39	Elavl2:chr4:91252706	6.54667	1.33333	-5.21333	3_prime_UTR_variant	-	0.0123407		Yes
40	Slc8a1:chr17:81648237	2.61	0.426667	-2.18333	synonymous_variant	-	0.0125164
41	Gabrb1:chr5:72146490	1.82	0.308333	-1.51167	3_prime_UTR_variant	-	0.0137321	Yes	Yes
42	Ttc7b:chr12:100301058	1.12	0.191667	-0.928333	3_prime_UTR_variant	-	0.0155646
43	Grin2b:chr6:135720485	2.12667	0.378333	-1.74833	3_prime_UTR_variant	-	0.017755	Yes	Yes
44	Pip4k2a:chr2:18843902	2.58	0.613333	-1.96667	3_prime_UTR_variant	-	0.0180772	Yes	Yes
45	Gm7308:chr6:127282366	97.9967	100	2.00333	non_coding_transcript_exon_variant	-	0.0191233
46	Zfp46:chr4:136293376	4.30667	0.92	-3.38667	3_prime_UTR_variant	-	0.0254333
47	Map1lc3a:chr2:155278062	3.10667	0.743333	-2.36333	3_prime_UTR_variant	-	0.0255008
48	Wipi1:chr11:109605915	3.43	0	-3.43	missense_variant	deleterious	0.0268149
49	Cox8a:chr19:7217578	3.89333	0.695	-3.19833	5_prime_UTR_variant	-	0.0268208
50	Fem1b:chr9:62796124	4.66667	1.47167	-3.195	missense_variant	tolerated	0.0273376
51	Iqsec1:chr6:90660434	0.943333	3.02333	2.08	3_prime_UTR_variant	-	0.0274944
52	Flot2:chr11:78059565	0.933333	1.84167	0.908333	3_prime_UTR_variant	-	0.0282803
53	Rassf2:chr2:131994640	2.20667	0	-2.20667	3_prime_UTR_variant	-	0.0284122
54	Grina:chr15:76248349	1.52	0.378333	-1.14167	missense_variant	deleterious	0.0287238
55	Rnf220:chr4:117272269	3.85333	0.651667	-3.20167	3_prime_UTR_variant	-	0.0289264
56	Lman2:chr13:55345547	3.93333	0.406667	-3.52667	3_prime_UTR_variant	-	0.0311438
57	Slc22a23:chr13:34183164	0.78	2.43167	1.65167	synonymous_variant	-	0.031595
58	Pcx:chr19:4510555	0	4.43667	4.43667	5_prime_UTR_variant	-	0.0323267
59	Rrp1:chr10:78400914	1.44667	0.465	-0.981667	synonymous_variant	-	0.0340563		Yes
60	Trp53bp1:chr2:121208038	0	0.975	0.975	missense_variant	tolerated	0.0342406	Yes
61	Tmem65:chr15:58783730	0.74	3.23167	2.49167	3_prime_UTR_variant	-	0.0344641
62	Igfbp5:chr1:72858298	0	1.61333	1.61333	3_prime_UTR_variant	-	0.0358814	Yes	Yes
63	Slc44a2:chr9:21353846	2.49333	0.705	-1.78833	3_prime_UTR_variant	-	0.0364761
64	Dock9:chr14:121560630	1.26333	0.333333	-0.93	missense_variant	deleterious	0.0367556	Yes
65	Bcl9:chr3:97209600	0	6.59667	6.59667	missense_variant	deleterious	0.0378737
66	Sart1:chr19:5384016	0	1.125	1.125	synonymous_variant	-	0.0381258
67	Atn1:chr6:124746459	0	1.16833	1.16833	missense_variant	tolerated_low_confidence	0.0387625	Yes	Yes
68	Prkar2a:chr9:108747368	1.94	0	-1.94	3_prime_UTR_variant	-	0.0396118	Yes
69	Npy1r:chr8:66705402	0	8.68167	8.68167	3_prime_UTR_variant	-	0.0402813	Yes
70	R3hdm2:chr10:127485563	1.18667	2.4	1.21333	missense_variant	tolerated	0.0404924
71	Nfyb:chr10:82751397	0	1.79667	1.79667	synonymous_variant	-	0.0406003
72	Ahcyl1:chr3:107677773	0	1.12167	1.12167	missense_variant	tolerated_low_confidence	0.0416851
73	Atp2b3:chrX:73570369	2.06333	0.583333	-1.48	missense_variant	deleterious_low_confidence	0.0419282	Yes
74	Gm4149:chr13:75644899	0	2.67333	2.67333	non_coding_transcript_exon_variant	-	0.0427198
75	Gm5628:chr13:17950575	14.6967	20.502	5.80533	non_coding_transcript_exon_variant	-	0.0434485
76	Cic:chr7:25288928	0	1.14667	1.14667	synonymous_variant	-	0.0456035
77	Rnd1:chr15:98676524	1.42	0.566667	-0.853333	synonymous_variant	-	0.0462986
78	Gm9800:chr14:8800119	4.37	1.30833	-3.06167	non_coding_transcript_exon_variant	-	0.0471135
79	Rgs2:chr1:144001078	3.45667	1.81	-1.64667	3_prime_UTR_variant	-	0.0484225	Yes	Yes
*P-values are calculated using Student's t-test
** P value of DAVID enrichment analysis of GAD_DISEASE_CLASS is 6.8 × 10-6
Events in old face indicate significant diffference in expression of the gene with RNA editing between the two groups.

## Sheet: Table S3
Table S3. Differential G-to-A RNA editing events between ES and PS.
No.	G-to-A RNA editing events	Mean of editing levels (%)			Consequence	SIFT	P*	Associated with psychitric diseases**	Associated with neurological diseases
		PS	ES	difference
1	Cul4a:chr8:13133758	0	1.65	1.65	missense_variant	tolerated	8.09299e-09
2	Cmip:chr8:117436681	0	1.27667	1.27667	missense_variant	tolerated_low_confidence	1.00575e-07
3	Mvb12b:chr2:33730066	0	1.05	1.05	3_prime_UTR_variant	-	9.24488e-07
4	Ttyh2:chr11:114720186	0	3.50667	3.50667	3_prime_UTR_variant	-	5.43313e-05	Yes
5	Slco1c1:chr6:141569508	0	5.45333	5.45333	missense_variant	tolerated_low_confidence	0.000381747	Yes
6	Abhd17a:chr10:80586656	0	1.56333	1.56333	missense_variant	tolerated	0.000580136
7	Ssx2ip:chr3:146428062	2.61333	0	-2.61333	synonymous_variant	-	0.00104319
8	Dzip3:chr16:48924538	2.15	0	-2.15	3_prime_UTR_variant	-	0.00137689
9	Drp2:chrX:134454263	5.63333	0	-5.63333	3_prime_UTR_variant	-	0.00173725	Yes
10	Atp6v1e1:chr6:120795455	0	1.44667	1.44667	3_prime_UTR_variant	-	0.00264662	Yes
11	Gna13:chr11:109401003	1.87667	0	-1.87667	3_prime_UTR_variant	-	0.00386906
12	Nuak1:chr10:84371733	2.65333	0	-2.65333	3_prime_UTR_variant	-	0.0044329	Yes
13	Gdf1:chr8:70330977	2.21667	0	-2.21667	missense_variant	tolerated	0.0046318
14	Rhob:chr12:8499687	0	1.54667	1.54667	5_prime_UTR_variant	-	0.00480749
15	Spon1:chr7:113836832	0	2.54	2.54	missense_variant	tolerated	0.00545602
16	Bbs1:chr19:4903875	0	3.74	3.74	missense_variant	tolerated	0.00601022
17	Unc13c:chr9:73639123	0	1.80333	1.80333	stop_gained	-	0.00685557		Yes
18	Gm2a:chr11:55110595	0	1.69	1.69	3_prime_UTR_variant	-	0.00723571
19	Mapre2:chr18:23891374	0	1.27333	1.27333	3_prime_UTR_variant	-	0.00788003		Yes
20	Sms:chrX:157444720	0	2.28	2.28	3_prime_UTR_variant	-	0.00814825
21	Thumpd1:chr7:119715723	1.77333	0	-1.77333	3_prime_UTR_variant	-	0.00859884
22	Gm10557:chr18:4198498	22.5067	6.3	-16.2067	non_coding_transcript_exon_variant	-	0.00916298
23	Lrrc24:chr15:76716113	0	2	2	synonymous_variant	-	0.00995718
24	Hectd4:chr5:121262561	0	1.38	1.38	missense_variant	deleterious_low_confidence	0.0100309
25	Alcam:chr16:52309830	0	1.96667	1.96667	missense_variant	tolerated	0.0101603
26	Uqcrq:chr11:53429000	0	1.57667	1.57667	3_prime_UTR_variant	-	0.0106788
27	Ppp1r26:chr2:28453973	0	2.20667	2.20667	3_prime_UTR_variant	-	0.0108703
28	Cct7:chr6:85468138	0.766667	1.87	1.10333	missense_variant	deleterious	0.0113527
29	Hpca:chr4:129111780	2.29333	0.296667	-1.99667	3_prime_UTR_variant	-	0.0115908
30	Mpdz:chr4:81335829	3.29667	0	-3.29667	missense_variant	deleterious	0.0117976
31	Aars:chr8:111043743	0	1.40333	1.40333	missense_variant	deleterious	0.0132909
32	Sparc:chr11:55394785	1.86	2.80667	0.946667	3_prime_UTR_variant	-	0.0135628		Yes
33	Tspan5:chr3:138903097	0	2.11667	2.11667	3_prime_UTR_variant	-	0.0136558
34	Dact3:chr7:16885193	0	1.77667	1.77667	synonymous_variant	-	0.0141161
35	Spcs3:chr8:54523322	2.26333	0	-2.26333	missense_variant	deleterious	0.0141826
36	Map1b:chr13:99432503	0.516667	3.41667	2.9	missense_variant	tolerated	0.014919	Yes
37	Dync1h1:chr12:110666921	0	3.74	3.74	3_prime_UTR_variant	-	0.0151332		Yes
38	Tmco3:chr8:13294917	0	1.75	1.75	synonymous_variant	-	0.0164432
39	Dip2b:chr15:100219016	0	2.73	2.73	3_prime_UTR_variant	-	0.0177011
40	Megf9:chr4:70430908	3.54	0	-3.54	3_prime_UTR_variant	-	0.0181247
41	Zkscan1:chr5:138103490	0	3.55667	3.55667	3_prime_UTR_variant	-	0.0184891
42	Dnajc27:chr12:4110545	0	4.20667	4.20667	3_prime_UTR_variant	-	0.0201216
43	Wdfy3:chr5:101848438	1.84667	0.346667	-1.5	missense_variant	tolerated	0.0203924
44	Zbtb41:chr1:139449090	0	9.39333	9.39333	3_prime_UTR_variant	-	0.0218285
45	Tmem43:chr6:91488141	0	2.09667	2.09667	3_prime_UTR_variant	-	0.023979
46	Pacsin1:chr17:27710908	4.13667	0.443333	-3.69333	3_prime_UTR_variant	-	0.0271735
47	Gm43597:chr5:150604196	0	9.37	9.37	non_coding_transcript_exon_variant	-	0.0276624
48	Faxc:chr4:21994701	0	5.72333	5.72333	3_prime_UTR_variant	-	0.0279203
49	Mlec:chr5:115147365	2.53333	0	-2.53333	3_prime_UTR_variant	-	0.0279827	Yes
50	Dnajc5:chr2:181552743	0.473333	2.07	1.59667	3_prime_UTR_variant	-	0.0283695
51	Tbc1d24:chr17:24175664	0	8.94667	8.94667	3_prime_UTR_variant	-	0.0289275
52	Huwe1:chrX:151934732	1.68667	4.52667	2.84	3_prime_UTR_variant	-	0.0300634
53	Myo9b:chr8:71359414	0	5.40667	5.40667	missense_variant	tolerated	0.030427
54	Srrm2:chr17:23816560	1.33667	0.263333	-1.07333	missense_variant	tolerated_low_confidence	0.0316793
55	Dynll2:chr11:87980246	1.05333	2.87333	1.82	3_prime_UTR_variant	-	0.0380515
56	Casc4:chr2:121912034	1.79	0.393333	-1.39667	synonymous_variant	-	0.03909		Yes
57	Smarcal1:chr1:72632902	0	1.85333	1.85333	missense_variant	tolerated	0.0394257
58	Elac1:chr18:73738316	0	2.55667	2.55667	3_prime_UTR_variant	-	0.0398711
59	Prrc2a:chr17:35154926	1.69667	0.34	-1.35667	missense_variant	tolerated	0.0409955
60	Pcif1:chr2:164891340	8.61	0	-8.61	3_prime_UTR_variant	-	0.0476255
61	Serpinh1:chr7:99346244	0.63	2.42333	1.79333	missense_variant	tolerated	0.0477546
62	Clcn6:chr4:148008712	1.46	0.323333	-1.13667	missense_variant	deleterious	0.0488033		Yes
	*P-values are calculated using Student's t-test
	Events in old face indicate significant diffference in expression of the gene with RNA editing between the two groups.
